# Supplementary material for: Mapping brain structural differences and neuroreceptor correlates in Parkinson’s disease visual hallucinations
Source: PubMed Central journal article supplement (PMC8791961; doi:10.1038/s41467-022-28087-0), 2022-01-26
Supplement: 41467_2022_28087_MOESM1_ESM.pdf [file 41467_2022_28087_MOESM1_ESM.pdf]

## Supplementary References

|                                                                                                   |            |
|---------------------------------------------------------------------------------------------------|------------|
| <i>Supplementary Note 1. The ComBat harmonisation method and its application on this dataset.</i> | <i>p2</i>  |
| <i>Supplementary Figure 1. Mean thickness before and after harmonisation.</i>                     | <i>p2</i>  |
| <i>Supplementary Note 2. Additional information on the full sample.</i>                           | <i>p3</i>  |
| <i>Supplementary Note 2a. Meta-analysis on demographics.</i>                                      | <i>P3</i>  |
| <i>Supplementary Figure 2. Forest plots for Supplementary Note 2a.</i>                            | <i>p3</i>  |
| <i>Supplementary Note 2b. Additional Information on the full sample.</i>                          | <i>p4</i>  |
| <i>Supplementary Note 3. Results from MANCOVAs.</i>                                               | <i>p5</i>  |
| <i>Supplementary Table 3a. Results from the main MANCOVAs.</i>                                    | <i>p5</i>  |
| <i>Supplementary Table 3b. Results from the sensitivity MANCOVAs (N=440 sample).</i>              | <i>p7</i>  |
| <i>Supplementary Table 3c. Results from the 'leave one group out' MANCOVAs.</i>                   | <i>p9</i>  |
| <i>Supplementary Note 4. NPI subgroup custom MANCOVAs</i>                                         | <i>p24</i> |
| <i>Supplementary Table 4(a). NPI Demographics</i>                                                 | <i>p24</i> |
| <i>Supplementary Table 4(b). NPI MANCOVA results</i>                                              | <i>p24</i> |
| <i>Supplementary Note 5. Ordinal Subgroup analysis</i>                                            | <i>p27</i> |
| <i>Supplementary Note 6. Additional models and details about receptor density maps.</i>           | <i>p29</i> |
| <i>Supplementary Note 6(a). Cortical thickness.</i>                                               | <i>p29</i> |
| <i>Supplementary Note 6(b). Volumes.</i>                                                          | <i>p29</i> |
| <i>Supplementary Figure 3. Additional scatter plots for receptors density profiles.</i>           | <i>p29</i> |
| <i>Supplementary Note 6(C). Correlations between receptor maps.</i>                               | <i>P30</i> |
| <i>Supplementary Note 7. Principal Component Analysis for cortical thickness</i>                  | <i>p31</i> |
| <i>Supplementary Figure 4. PCA additional details.</i>                                            | <i>p31</i> |
| <i>Supplementary Note 8(a). Structural covariance.</i>                                            | <i>p32</i> |
| <i>Supplementary Figure5. Correlogram on thickness covariance.</i>                                | <i>p33</i> |
| <i>Supplementary Figure6. Correlogram on surface area covariance.</i>                             | <i>p34</i> |
| <i>Supplementary Figure7. Community plots by lobe.</i>                                            | <i>p35</i> |
| <i>Supplementary Note 8(b). Additional network thickness analysis.</i>                            | <i>p36</i> |

## Supplementary Information

### Supplementary Note 1. *The ComBat harmonisation method and its application on this dataset.*

As noted in the Methods section, this algorithm was first developed for genomics analyses requiring to pool together data from different datasets (Johnson, Li and Rabinovic, 2007) and has been recently adapted to other measures, such as cortical thickness (Fortin et al., 2018). ComBat applies empirical Bayes (EB) estimation to account for site-specific variance by using an error with a multiplicative scaling factor that is scanner specific. The model allows to retain biological variance, such as that related to age, gender and disease (in our case, hallucinators and non hallucinators), variables that are entered the model as a vector. The algorithm is used on segmented and parcellated data, before running any other statistical analysis and has proven extremely reliable for this type of analyses as described in Fortin et al., 2018 and more recently by Radua et al., 2020. Hierarchical Bayes (HB) is also being proposed to harmonise data from different sites (Kia et al., 2020<sup>1</sup>). However, we chose to use EB and as the purpose of this study was not to assess the suitability of harmonisation models but to build on such harmonisation to develop models for the understanding of the mechanisms underlying visual hallucinations in PD. Secondly, EB is less dependent on the hyper-parameter settings and thus uses data more directly, which for our purposes was the most suitable choice, as HB would possibly be more suitable for approaches whereby a careful specification of hyper-parameters is crucial, as is the case for normative modelling (Kia et al., 2020<sup>1</sup>).

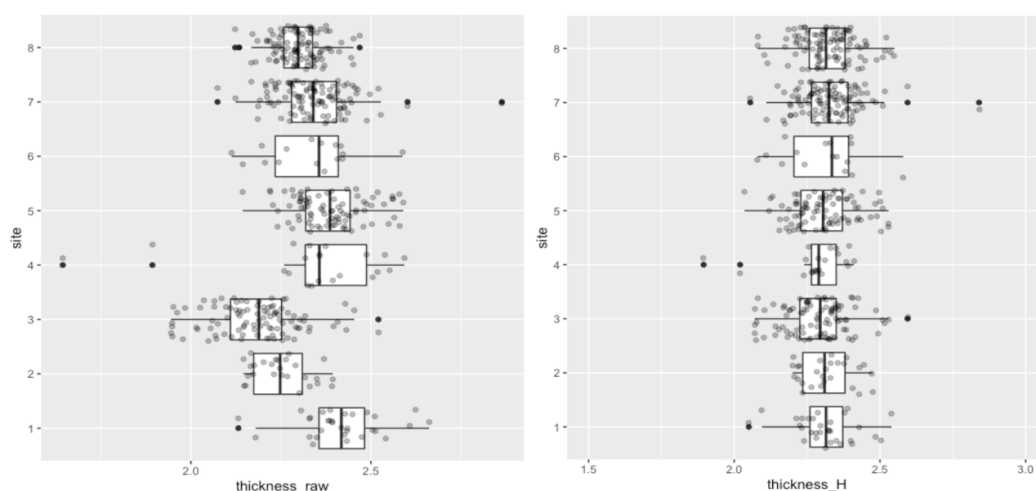

**Supplementary Figure 1.** *Mean thickness before (`thickness_raw`) and after harmonisation (`thickness_H`). On the X axis thickness values, on the Y axis the numbers correspond to the different sites. Sites: 1 = University of Lille, N=31; 2 = Hong Kong University, N=27; 3 = Yonsei University, N=88; 4 = Newcastle University, N=21; 5 = University of Sydney, N=97; 6 = KCL (Dr. ffytche), N= 16; 7 = Oxford Discovery Cohort, N=110; 8 = University College London, N=103. The bounds of the boxes represent the 25<sup>th</sup> (left edge) and 75<sup>th</sup> (right edge) percentiles, the center is the median. The whiskers represent the largest (right) and smallest (left) value within 1.5 interquartile range below the 25<sup>th</sup> percentile (left) or above the 75<sup>th</sup> (right). The black dots represent outliers that were inspected and retained.*

### Supplementary Note 2. *Additional information on the full sample.*

a) Meta-analysis to determine whether participants in the full sample (N=493) differ on the relevant demographic and clinical variables.

As we did not have raw data for all groups for all relevant variables, we tested whether our participants were overall matched for age, onset, MMSE, UPDRS and LED by using the mean and standard deviation computed on the raw data, when available, and, when not available, from the data reported in the original publication (note: in some cases the sample was not exactly the same, thus this analysis is an estimate). Most of the groups provided some clinical raw data, but there were missing values for MMSE and UPDRS. We decided to remove those cases from this analysis. The analysis was carried out with R package ‘metafor’. Results show that participants are overall matched for age, onset and levodopa equivalent daily dose (LED). Patients differ on MMSE and UPDRS-III scores, with PD-VH presenting lower MMSE and higher UPDRS-III scores (see forest plots and stats below). We excluded the whole Hong Kong Cohort (N=27) because we had only data from the publication about this cohort (except for age). We excluded N = 7 PD-VH and N =15 PD-noVH from the Yonsei study because of UPDRS-III missing data and N= 2 PD-VH, N =15 PD-noVH from the Sydney study because of MMSE missing data.

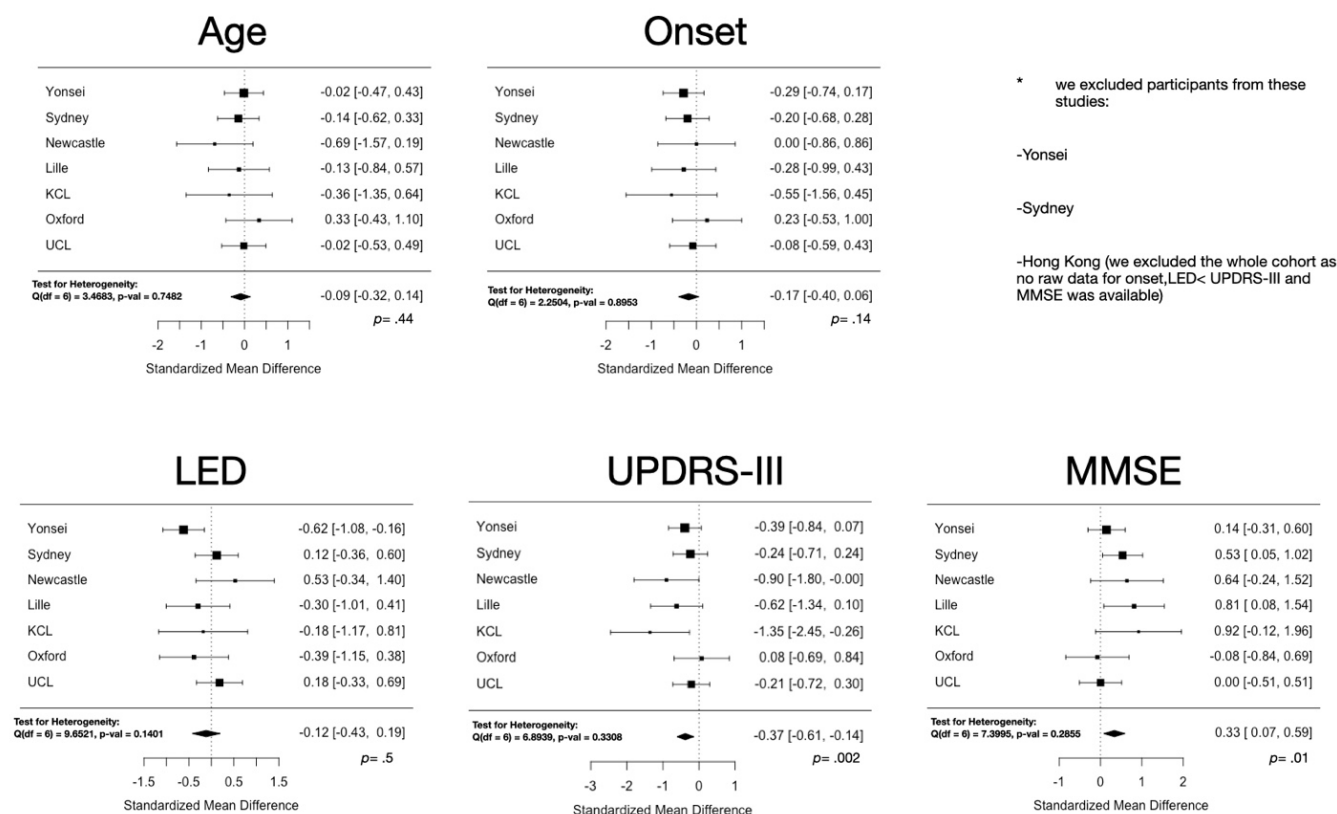

**Supplementary Figure 2.** The forest plots show a higher UPDRS-III score (difference is 5.8 (sd 2.7) with both groups being within the ‘moderate’ category as reported in Martínez-Martín et al., 2014<sup>1</sup>) for VH and a lower MMSE (difference

<sup>1</sup> Martínez-Martín, P., Rodríguez-Blázquez, C., Forjaz, M. J., Alvarez-Sánchez, M., Arakaki, T., Bergareche-Yarza, A., ... & Goetz, C. G. (2014). Relationship between the MDS-UPDRS domains and the health-related quality of life of Parkinson's disease patients. *European Journal of Neurology*, 21(3), 519-524.

is 1 point (sd 0.1; with 29.4 for noVH and 28.8 for VH) score for VH. For each variable and study, we report the mean difference and in the square brackets the confidence intervals.

b) *Information on values for brain volume, total intracranial volume (TIV), total gray matter volume (GM) and age differences in the full sample.* Brain vol. (seg) describes the volume of all voxels in the `aparc+aseg.mgz` based on which the morphometric information were extracted. This includes voxels that are not background or brainstem, and includes vessel, optic chiasm and CSF segmentations. One-way ANOVAs showed that PD-VH did not significantly differ in TIV from PD-noVH (PD-VH,  $1488363.39 \pm 192038.64$ , PD-noVH,  $1512273.57 \pm 216293.33$ ,  $p = .84$ ), in the segmented brain volume (PD-VH  $=0.74 \pm 0.05$ , PD-noVH  $= 0.74 \pm 0.06$ ,  $p = .12$ ) but did differ in terms of gray matter volume (PD-VH  $559525.16 \pm 63591.98$ , PD-noVH  $584869.68 \pm 71580.08$ ,  $p = .02$ ).

**Supplementary Note 3.** Results from the MANCOVAs.

**Supplementary Table 3(a).** Table for thickness, surface area and volume differences (tests of between-subjects effect and Bonferroni corrected pairwise comparisons) in PD with VH vs. PD no VH patients. Difference was computed with a between subjects (VH vs. noVH) MANCOVA with age, gender and TIV as covariates. The regions entered in this analyses were derived from a VH vs noVH ANOVA, then we FDR corrected the p value of the regions showing difference of the means and retained only those surviving this procedure to be entered in this analysis. Pairwise comparisons are Bonferroni corrected. Regions are reported in descendent order by effect size, as the regions depicted in Figure 1 in the main text are color coded by effect size.

| <b>Region</b>     | <b>df</b> | <b>Mean Square</b> | <b>F</b> | <b>p</b> | <b>Partial Eta Squared</b> | <b>Observed Power</b> |
|-------------------|-----------|--------------------|----------|----------|----------------------------|-----------------------|
| R_precuneus       | 1,492     | 0.456              | 16.330   | 0.000    | 0.032                      | 0.981                 |
| L_octemps_ML.sulc | 1,492     | 0.402              | 15.570   | 0.000    | 0.031                      | 0.976                 |
| R_planumtempS     | 1,492     | 0.589              | 14.878   | 0.000    | 0.030                      | 0.971                 |
| L_sup_par         | 1,492     | 0.397              | 14.624   | 0.000    | 0.029                      | 0.968                 |
| R_ips             | 1,492     | 0.246              | 13.016   | 0.000    | 0.026                      | 0.950                 |
| R_parietalS       | 1,492     | 0.318              | 12.189   | 0.001    | 0.024                      | 0.936                 |
| L_ips             | 1,492     | 0.207              | 11.994   | 0.001    | 0.024                      | 0.933                 |
| R_occAnt_sul      | 1,492     | 0.394              | 11.724   | 0.001    | 0.023                      | 0.927                 |
| L_occAnt_sulc     | 1,492     | 0.424              | 11.420   | 0.001    | 0.023                      | 0.921                 |
| R_supTempsul      | 1,492     | 0.203              | 11.344   | 0.001    | 0.023                      | 0.919                 |
| L_precuneus       | 1,492     | 0.307              | 10.744   | 0.001    | 0.022                      | 0.905                 |
| L_ifg_orb         | 1,492     | 0.477              | 10.620   | 0.001    | 0.021                      | 0.902                 |
| R_occtemp_ML.s    | 1,492     | 0.291              | 10.614   | 0.001    | 0.021                      | 0.902                 |
| R_insSHort        | 1,492     | 0.929              | 10.431   | 0.001    | 0.021                      | 0.897                 |
| R_ifgTr           | 1,492     | 0.321              | 10.421   | 0.001    | 0.021                      | 0.897                 |
| R_frontopolTrs    | 1,492     | 0.309              | 10.217   | 0.001    | 0.021                      | 0.891                 |
| R_mfg             | 1,492     | 0.194              | 10.107   | 0.002    | 0.020                      | 0.887                 |
| L_sfg             | 1,492     | 0.229              | 9.913    | 0.002    | 0.020                      | 0.881                 |
| L_ITG             | 1,492     | 0.338              | 9.699    | 0.002    | 0.019                      | 0.875                 |
| L_cingMarg_s      | 1,492     | 0.240              | 9.647    | 0.002    | 0.019                      | 0.873                 |
| L_ifg_op          | 1,492     | 0.234              | 9.454    | 0.002    | 0.019                      | 0.866                 |
| L_inf_angular     | 1,492     | 0.244              | 9.385    | 0.002    | 0.019                      | 0.864                 |
| R_precentrInf     | 1,492     | 0.230              | 9.248    | 0.002    | 0.019                      | 0.859                 |
| L_temp_pole       | 1,492     | 0.506              | 9.193    | 0.003    | 0.018                      | 0.857                 |
| R_subcall         | 1,492     | 1.222              | 8.688    | 0.003    | 0.017                      | 0.837                 |
| L_cuneus          | 1,492     | 0.159              | 8.579    | 0.004    | 0.017                      | 0.832                 |
| R_cuneus          | 1,492     | 0.164              | 8.030    | 0.005    | 0.016                      | 0.807                 |
| L_parietoOc       | 1,492     | 0.156              | 7.819    | 0.005    | 0.016                      | 0.797                 |
| R_occsupG         | 1,492     | 0.209              | 7.230    | 0.007    | 0.015                      | 0.765                 |
| R_octemp_ML       | 1,492     | 0.123              | 7.086    | 0.008    | 0.014                      | 0.757                 |
| R_supFr           | 1,492     | 0.134              | 7.000    | 0.008    | 0.014                      | 0.752                 |
| R_latFissureP     | 1,492     | 0.152              | 6.977    | 0.009    | 0.014                      | 0.751                 |
| R_sfg             | 1,492     | 0.144              | 6.728    | 0.010    | 0.014                      | 0.735                 |
| R_ifg_op          | 1,492     | 0.202              | 6.680    | 0.010    | 0.014                      | 0.732                 |
| R_mtg             | 1,492     | 0.218              | 6.541    | 0.011    | 0.013                      | 0.723                 |

|                  |       |       |       |       |       |       |
|------------------|-------|-------|-------|-------|-------|-------|
| R_infang         | 1,492 | 0.153 | 6.391 | 0.012 | 0.013 | 0.713 |
| R_subpar         | 1,492 | 0.203 | 6.344 | 0.012 | 0.013 | 0.710 |
| L_stg_lat        | 1,492 | 0.276 | 6.341 | 0.012 | 0.013 | 0.710 |
| L_inf_smg        | 1,492 | 0.164 | 6.317 | 0.012 | 0.013 | 0.708 |
| R_itg            | 1,492 | 0.207 | 6.241 | 0.013 | 0.013 | 0.703 |
| L_occ_s          | 1,492 | 0.198 | 6.197 | 0.013 | 0.013 | 0.700 |
| L_plan_tempor_s  | 1,492 | 0.249 | 6.173 | 0.013 | 0.012 | 0.698 |
| L_rectus         | 1,492 | 0.203 | 6.007 | 0.015 | 0.012 | 0.687 |
| R_temporalPOle   | 1,492 | 0.357 | 5.977 | 0.015 | 0.012 | 0.684 |
| L_stg            | 1,492 | 0.299 | 5.682 | 0.018 | 0.012 | 0.662 |
| R_latfusif       | 1,492 | 0.235 | 5.606 | 0.018 | 0.011 | 0.657 |
| L_ifg_triang     | 1,492 | 0.163 | 5.578 | 0.019 | 0.011 | 0.654 |
| L_ifs            | 1,492 | 0.098 | 5.560 | 0.019 | 0.011 | 0.653 |
| R_orbG           | 1,492 | 0.149 | 5.499 | 0.019 | 0.011 | 0.648 |
| R_precentr       | 1,492 | 0.316 | 5.472 | 0.020 | 0.011 | 0.646 |
| R_ifg_orb        | 1,492 | 0.301 | 5.354 | 0.021 | 0.011 | 0.637 |
| R_precentS       | 1,492 | 0.159 | 5.248 | 0.022 | 0.011 | 0.628 |
| L_precentralg    | 1,492 | 0.285 | 5.203 | 0.023 | 0.011 | 0.624 |
| L_mfg            | 1,492 | 0.099 | 5.038 | 0.025 | 0.010 | 0.610 |
| R_moccG          | 1,492 | 0.125 | 5.016 | 0.026 | 0.010 | 0.608 |
| L_paracentral_g  | 1,492 | 0.197 | 4.893 | 0.027 | 0.010 | 0.598 |
| R_rectus         | 1,492 | 0.206 | 4.810 | 0.029 | 0.010 | 0.591 |
| L_fiss_hor_ant   | 1,492 | 0.270 | 4.777 | 0.029 | 0.010 | 0.588 |
| L_fis_post       | 1,492 | 0.112 | 4.758 | 0.030 | 0.010 | 0.586 |
| L_occ_m          | 1,492 | 0.116 | 4.718 | 0.030 | 0.010 | 0.582 |
| R_supTrans       | 1,492 | 0.103 | 4.441 | 0.036 | 0.009 | 0.557 |
| L_sfs            | 1,492 | 0.090 | 4.356 | 0.037 | 0.009 | 0.549 |
| R_stglat         | 1,492 | 0.187 | 4.276 | 0.039 | 0.009 | 0.541 |
| L_octempSul_lat  | 1,492 | 0.158 | 4.263 | 0.039 | 0.009 | 0.540 |
| R_octemp_Lat     | 1,492 | 0.162 | 4.205 | 0.041 | 0.009 | 0.535 |
| L_trsv           | 1,492 | 0.096 | 4.195 | 0.041 | 0.009 | 0.534 |
| L_collaTr_ants   | 1,492 | 0.186 | 4.184 | 0.041 | 0.009 | 0.533 |
| L_central        | 1,492 | 0.070 | 4.100 | 0.043 | 0.008 | 0.524 |
| L_ins_g_short    | 1,492 | 0.298 | 4.068 | 0.044 | 0.008 | 0.521 |
| R_inffrontsulc   | 1,492 | 0.069 | 3.883 | 0.049 | 0.008 | 0.503 |
| R_paracentr      | 1,492 | 0.152 | 3.872 | 0.050 | 0.008 | 0.502 |
| R_latfissAntvert | 1,492 | 0.320 | 3.836 | 0.051 | 0.008 | 0.498 |
| R_parietoOcc     | 1,492 | 0.067 | 3.724 | 0.054 | 0.008 | 0.486 |

**Surface area ANCOVA (age, gender, TIV as covariates)**

| <i>Region</i>   | <i>mean square</i> | <i>df</i> | <i>F</i> | <i>partial eta2</i> | <i>p</i> | <i>obs. power</i> |
|-----------------|--------------------|-----------|----------|---------------------|----------|-------------------|
| R_occtemp.gyrus | 796730.83          | 1,488     | 10.876   | 0.022               | 0.001    | 0.908             |

**Subcortical volumes MANCOVA (age, gender and TIV as covariates)**

| <i>Region</i> | <i>mean square</i> | <i>df</i> | <i>F</i> | <i>partial eta2</i> | <i>p</i> | <i>obs. power</i> |
|---------------|--------------------|-----------|----------|---------------------|----------|-------------------|
|---------------|--------------------|-----------|----------|---------------------|----------|-------------------|

|                        |            |      |            |       |       |       |
|------------------------|------------|------|------------|-------|-------|-------|
| Left-Cerebellum-<br>WM | 25136509.5 | 1488 | 4.80338071 | 0.011 | 0.029 | 0.59  |
| R amygdala             | 278036.6   | 1488 | 5.33541167 | 0.021 | 0.021 | 0.635 |
| L amygdala             | 349741.74  | 1488 | 6.66409361 | 0.013 | 0.01  | 0.731 |

**Supplementary Table 3(b).** Additional MANCOVA (VH vs noVH) with age, gender and TIV (as for the main model in (a)) and onset, LED, MMSE, UPDRS-III as covariates on a sample of N=440 participants (121 VH) for whom we had this additional data. A few participants had missing data that were filled with the mean of the group (N = 7 PD-VH and N =15 PD-noVH from the Yonsei study and N= 2 PD-VH, N =15 PD-noVH from the Sydney study). For cortical thickness there was also a significant main effect of age [ $F(88,344)=2.38, p <.001$ ], gender [ $F(88,344)=1.56, p = .003$ ], TIV [ $F(88,344)=3.79 p <.001$ ], but not of LED, onset, MMSE, UPDRS-III.

**Cortical thickness (cov. Age, gender, TIV, onset, LED, MMSE, UPDRS-III)**

| Region         | mean square | df    | F      | partial eta2 | p     | obs. power |
|----------------|-------------|-------|--------|--------------|-------|------------|
| R_ips          | 0,320       | 1,439 | 17,009 | 0,038        | 0,000 | 0,984      |
| L_octemps_ML   | 0,350       | 1,439 | 13,550 | 0,030        | 0,000 | 0,957      |
| R_planumtempS  | 0,496       | 1,439 | 12,879 | 0,029        | 0,000 | 0,947      |
| L_ips          | 0,222       | 1,439 | 12,692 | 0,029        | 0,000 | 0,945      |
| R_precuneus    | 0,350       | 1,439 | 12,409 | 0,028        | 0,000 | 0,940      |
| L_sup_par      | 0,342       | 1,439 | 12,355 | 0,028        | 0,000 | 0,939      |
| L_occAnt_sulc  | 0,428       | 1,439 | 11,559 | 0,026        | 0,001 | 0,924      |
| L_ITG          | 0,385       | 1,439 | 11,136 | 0,025        | 0,001 | 0,915      |
| L_cingMarg_s   | 0,272       | 1,439 | 10,855 | 0,025        | 0,001 | 0,908      |
| R_mfg          | 0,203       | 1,439 | 10,795 | 0,024        | 0,001 | 0,906      |
| R_supTempsul   | 0,191       | 1,439 | 10,765 | 0,024        | 0,001 | 0,906      |
| L_temp_pole    | 0,575       | 1,439 | 10,425 | 0,024        | 0,001 | 0,896      |
| R_parietalS    | 0,269       | 1,439 | 10,375 | 0,024        | 0,001 | 0,895      |
| L_precuneus    | 0,287       | 1,439 | 9,875  | 0,022        | 0,002 | 0,880      |
| L_ifg_op       | 0,241       | 1,439 | 9,672  | 0,022        | 0,002 | 0,874      |
| R_frontopolTrs | 0,298       | 1,439 | 9,599  | 0,022        | 0,002 | 0,871      |
| R_precentrInf  | 0,235       | 1,439 | 9,353  | 0,021        | 0,002 | 0,862      |
| R_cuneus       | 0,197       | 1,439 | 9,128  | 0,021        | 0,003 | 0,854      |
| R_occAnt_sul   | 0,308       | 1,439 | 9,123  | 0,021        | 0,003 | 0,854      |
| R_precentS     | 0,270       | 1,439 | 8,994  | 0,020        | 0,003 | 0,849      |
| R_occsupG      | 0,252       | 1,439 | 8,842  | 0,020        | 0,003 | 0,843      |
| L_ifg_orb      | 0,396       | 1,439 | 8,642  | 0,020        | 0,003 | 0,835      |
| R_subpar       | 0,257       | 1,439 | 8,081  | 0,018        | 0,005 | 0,810      |
| R_supFr        | 0,152       | 1,439 | 8,063  | 0,018        | 0,005 | 0,809      |
| R_infang       | 0,182       | 1,439 | 7,742  | 0,018        | 0,006 | 0,793      |
| L_ifs          | 0,137       | 1,439 | 7,733  | 0,018        | 0,006 | 0,792      |
| L_inf_angular  | 0,199       | 1,439 | 7,652  | 0,017        | 0,006 | 0,788      |
| L_cuneus       | 0,141       | 1,439 | 7,342  | 0,017        | 0,007 | 0,771      |
| L_sfg          | 0,167       | 1,439 | 7,312  | 0,017        | 0,007 | 0,770      |
| R_ifgTr        | 0,220       | 1,439 | 7,191  | 0,016        | 0,008 | 0,763      |
| R_occtemp_ML.s | 0,191       | 1,439 | 6,843  | 0,016        | 0,009 | 0,742      |

|                   |       |       |       |       |       |       |
|-------------------|-------|-------|-------|-------|-------|-------|
| L_parietoOc       | 0,140 | 1,439 | 6,816 | 0,016 | 0,009 | 0,741 |
| L_fiss_hor_ant    | 0,372 | 1,439 | 6,781 | 0,015 | 0,010 | 0,738 |
| R_latFissureP     | 0,146 | 1,439 | 6,765 | 0,015 | 0,010 | 0,737 |
| L_mfg             | 0,127 | 1,439 | 6,386 | 0,015 | 0,012 | 0,713 |
| L_paracentral_g   | 0,248 | 1,439 | 6,283 | 0,014 | 0,013 | 0,706 |
| R_Jenses          | 0,257 | 1,439 | 6,072 | 0,014 | 0,014 | 0,691 |
| R_mtg             | 0,202 | 1,439 | 6,057 | 0,014 | 0,014 | 0,690 |
| R_ifg_op          | 0,173 | 1,439 | 5,794 | 0,013 | 0,016 | 0,671 |
| L_occ_s           | 0,177 | 1,439 | 5,672 | 0,013 | 0,018 | 0,661 |
| R_paracentr       | 0,218 | 1,439 | 5,603 | 0,013 | 0,018 | 0,656 |
| R_supTrans        | 0,132 | 1,439 | 5,562 | 0,013 | 0,019 | 0,653 |
| L_plan_tempor_s   | 0,223 | 1,439 | 5,557 | 0,013 | 0,019 | 0,653 |
| R_transpost       | 0,224 | 1,439 | 5,425 | 0,012 | 0,020 | 0,642 |
| L_collaTr_ants    | 0,235 | 1,439 | 5,415 | 0,012 | 0,020 | 0,641 |
| L_ifg_triang      | 0,158 | 1,439 | 5,349 | 0,012 | 0,021 | 0,636 |
| R_temporalPOle    | 0,311 | 1,439 | 5,347 | 0,012 | 0,021 | 0,636 |
| R_ifg_orb         | 0,294 | 1,439 | 5,161 | 0,012 | 0,024 | 0,621 |
| R_insSHort        | 0,455 | 1,439 | 5,083 | 0,012 | 0,025 | 0,614 |
| L_rectus          | 0,175 | 1,439 | 5,013 | 0,011 | 0,026 | 0,608 |
| R_sfg             | 0,104 | 1,439 | 4,976 | 0,011 | 0,026 | 0,605 |
| R_precentr        | 0,279 | 1,439 | 4,942 | 0,011 | 0,027 | 0,602 |
| L_inf_smg         | 0,129 | 1,439 | 4,926 | 0,011 | 0,027 | 0,600 |
| R_octemp_ML       | 0,088 | 1,439 | 4,916 | 0,011 | 0,027 | 0,600 |
| R_itg             | 0,164 | 1,439 | 4,892 | 0,011 | 0,027 | 0,598 |
| L_fis_ver_ant     | 0,264 | 1,439 | 4,810 | 0,011 | 0,029 | 0,590 |
| R_latfissAntvert  | 0,411 | 1,439 | 4,796 | 0,011 | 0,029 | 0,589 |
| R_moccG           | 0,118 | 1,439 | 4,794 | 0,011 | 0,029 | 0,589 |
| R_inffrontsulc    | 0,080 | 1,439 | 4,521 | 0,010 | 0,034 | 0,564 |
| R_subcall         | 0,617 | 1,439 | 4,423 | 0,010 | 0,036 | 0,555 |
| R_octemp_Lat      | 0,170 | 1,439 | 4,310 | 0,010 | 0,038 | 0,544 |
| L_sfs             | 0,087 | 1,439 | 4,271 | 0,010 | 0,039 | 0,541 |
| L_infTempSul      | 0,125 | 1,439 | 4,244 | 0,010 | 0,040 | 0,538 |
| R_latfusif        | 0,177 | 1,439 | 4,110 | 0,009 | 0,043 | 0,525 |
| L_trsv            | 0,093 | 1,439 | 4,017 | 0,009 | 0,046 | 0,516 |
| R_rectus          | 0,176 | 1,439 | 4,015 | 0,009 | 0,046 | 0,516 |
| L_precentralg     | 0,205 | 1,439 | 3,804 | 0,009 | 0,052 | 0,494 |
| L_precentrInf     | 0,099 | 1,439 | 3,694 | 0,008 | 0,055 | 0,483 |
| R_INfparsupramarg | 0,097 | 1,439 | 3,532 | 0,008 | 0,061 | 0,466 |

**Surface area ANCOVA (cov. Age, gender, TIV, onset, LED, MMSE, UPDRS-III)**

| Region           | mean square | df    | F     | partial eta2 | p     | obs. power |
|------------------|-------------|-------|-------|--------------|-------|------------|
| R_occtemp. gyrus | 519216.46   | 1,439 | 7.123 | 0.02         | 0.008 | 0.76       |

For subcortical volume there was also a significant main effect of age [ $F(1,439)=71.23, p < .001$ ], TIV [ $F(1,439)=27.71, p < .001$ ] and onset [ $F(1,439)=4.67, p = .03$ ] but not of MMSE, UPDRS-III or LED.



**Subcortical volumes MANCOVA (age, gender and TIV as covariates)**

| <i>Region</i> | <i>mean square</i> | <i>df</i> | <i>F</i> | <i>partial eta2</i> | <i>p</i> | <i>obs. power</i> |
|---------------|--------------------|-----------|----------|---------------------|----------|-------------------|
| R amygdala    | 251688.77          | 1,439     | 4.996    | 0.011               | 0.026    | 0.61              |
| L amygdala    | 321003.61          | 1,439     | 6.310    | 0.012               | 0.012    | 0.71              |
| R caudate *   | 2041364.73         | 1,439     | 7.068    | 0.016               | 0.008    | 0.756             |

\*The caudate is bigger in VH than noVH (as in the second subgroup analysis reported in S4).

For subcortical volume there was also a significant main effect of age [ $F(16,416)=14.13, p <.001$ ], gender [ $F(16,416)=1.87, p = .02$ ], TIV [ $F(16,416)=32.55, p <.001$ ] and LED [ $F(16,416)=1.72, p = .04$ ] but not of MMSE, UPDRS-III or disease onset.

**Supplementary Table 3(c).** Tables for the 'leave one group out' approach on the full sample, with age, gender and TIV as covariates. We report tests of between-subjects effect and Bonferroni corrected pairwise comparisons in PD with VH vs. PD no VH patients. The regions entered in this analyses were derived from a VH vs noVH ANOVA, then we FDR corrected the p value of the regions showing difference of the means and retained only those surviving this procedure to be entered in this analysis. Pairwise comparisons are Bonferroni corrected. Regions are reported in descendent order by effect size.

For thickness we observe throughout consistently results, with a variable reduction of the regions found when not including the Yonsei, Newcastle, Sydney and UCL groups in particular in the lateral fissures and collateral transverse and paracentral regions.

**Cortical thickness MANCOVA (cov: age, gender, TIV) - leave one group out test**

**without Lille group**

| <i>Region</i> | <i>Mean Square</i> | <i>F</i> | <i>Sig.</i> | <i>Partial Eta Squared</i> | <i>Power</i> |
|---------------|--------------------|----------|-------------|----------------------------|--------------|
| R_precuneus   | 0.407              | 14.530   | 0.000       | 0.031                      | 0.967        |
| R_planumtempS | 0.525              | 13.150   | 0.000       | 0.028                      | 0.951        |
| L_sup_par     | 0.346              | 12.781   | 0.000       | 0.027                      | 0.946        |
| R_ips         | 0.223              | 11.723   | 0.001       | 0.025                      | 0.927        |
| L_octemps_ML  | 0.296              | 11.483   | 0.001       | 0.025                      | 0.922        |
| L_ITG         | 0.394              | 11.392   | 0.001       | 0.024                      | 0.920        |
| R_mfg         | 0.213              | 11.309   | 0.001       | 0.024                      | 0.919        |
| R_parietalS   | 0.292              | 11.119   | 0.001       | 0.024                      | 0.914        |
| L_occAnt_sulc | 0.420              | 11.076   | 0.001       | 0.024                      | 0.913        |
| L_ips         | 0.186              | 10.786   | 0.001       | 0.023                      | 0.906        |
| L_ifg_op      | 0.259              | 10.505   | 0.001       | 0.022                      | 0.899        |
| L_sfg         | 0.236              | 10.258   | 0.001       | 0.022                      | 0.892        |
| R_subcall     | 1.450              | 10.182   | 0.002       | 0.022                      | 0.890        |

|                 |       |        |       |       |       |
|-----------------|-------|--------|-------|-------|-------|
| R_frontopolTrs  | 0.308 | 10.088 | 0.002 | 0.022 | 0.887 |
| L_precuneus     | 0.285 | 9.968  | 0.002 | 0.021 | 0.883 |
| L_inf_angular   | 0.243 | 9.481  | 0.002 | 0.020 | 0.867 |
| R_supTempsul    | 0.171 | 9.461  | 0.002 | 0.020 | 0.866 |
| L_ifg_orb       | 0.409 | 9.093  | 0.003 | 0.020 | 0.853 |
| R_occAnt_sul    | 0.302 | 9.031  | 0.003 | 0.019 | 0.851 |
| R_precentrInf   | 0.226 | 9.027  | 0.003 | 0.019 | 0.850 |
| R_ifgTr         | 0.267 | 8.736  | 0.003 | 0.019 | 0.839 |
| R_supFr         | 0.162 | 8.483  | 0.004 | 0.018 | 0.828 |
| L_cuneus        | 0.157 | 8.460  | 0.004 | 0.018 | 0.827 |
| R_occtemp_ML.s  | 0.228 | 8.342  | 0.004 | 0.018 | 0.822 |
| R_sfg           | 0.171 | 8.045  | 0.005 | 0.017 | 0.808 |
| R_insSHort      | 0.697 | 7.800  | 0.005 | 0.017 | 0.796 |
| R_itg           | 0.258 | 7.783  | 0.005 | 0.017 | 0.795 |
| L_cingMarg_s    | 0.196 | 7.697  | 0.006 | 0.017 | 0.791 |
| R_precentS      | 0.231 | 7.509  | 0.006 | 0.016 | 0.781 |
| L_temp_pole     | 0.409 | 7.409  | 0.007 | 0.016 | 0.775 |
| L_plan_tempor_s | 0.281 | 7.043  | 0.008 | 0.015 | 0.754 |
| L_occ_s         | 0.223 | 6.989  | 0.008 | 0.015 | 0.751 |
| L_inf_smg       | 0.172 | 6.693  | 0.010 | 0.014 | 0.733 |
| L_stg_lat       | 0.274 | 6.344  | 0.012 | 0.014 | 0.710 |
| L_parietoOc     | 0.122 | 6.120  | 0.014 | 0.013 | 0.695 |
| R_paracentr     | 0.240 | 6.100  | 0.014 | 0.013 | 0.693 |
| R_latFissureP   | 0.133 | 6.063  | 0.014 | 0.013 | 0.690 |
| R_latfusif      | 0.251 | 5.936  | 0.015 | 0.013 | 0.681 |
| R_octemp_ML     | 0.101 | 5.896  | 0.016 | 0.013 | 0.678 |
| R_precentr      | 0.333 | 5.794  | 0.016 | 0.013 | 0.671 |
| R_ifg_op        | 0.170 | 5.654  | 0.018 | 0.012 | 0.660 |
| R_mtg           | 0.189 | 5.642  | 0.018 | 0.012 | 0.659 |
| R_occsupG       | 0.157 | 5.399  | 0.021 | 0.012 | 0.640 |
| R_cuneus        | 0.109 | 5.382  | 0.021 | 0.012 | 0.639 |
| R_temporalPOle  | 0.316 | 5.285  | 0.022 | 0.011 | 0.631 |
| L_precentralg   | 0.284 | 5.253  | 0.022 | 0.011 | 0.628 |
| R_infang        | 0.123 | 5.155  | 0.024 | 0.011 | 0.620 |
| L_mfg           | 0.100 | 5.104  | 0.024 | 0.011 | 0.616 |
| R_rectus        | 0.216 | 5.081  | 0.025 | 0.011 | 0.614 |
| R_subpar        | 0.162 | 5.031  | 0.025 | 0.011 | 0.610 |
| L_octempSul_lat | 0.186 | 4.963  | 0.026 | 0.011 | 0.604 |
| L_paracentral_g | 0.199 | 4.954  | 0.027 | 0.011 | 0.603 |
| L_fiss_hor_ant  | 0.274 | 4.839  | 0.028 | 0.010 | 0.593 |
| L_occ_m         | 0.116 | 4.770  | 0.029 | 0.010 | 0.587 |
| R_orbG          | 0.129 | 4.748  | 0.030 | 0.010 | 0.585 |
| L_infTempSul    | 0.139 | 4.687  | 0.031 | 0.010 | 0.579 |
| L_fis_post      | 0.110 | 4.680  | 0.031 | 0.010 | 0.579 |
| L_stg           | 0.235 | 4.506  | 0.034 | 0.010 | 0.563 |

|                  |       |       |       |       |       |
|------------------|-------|-------|-------|-------|-------|
| L_trsv           | 0.104 | 4.481 | 0.035 | 0.010 | 0.561 |
| L_insulaA        | 0.217 | 4.460 | 0.035 | 0.010 | 0.559 |
| L_fis_ver_ant    | 0.251 | 4.435 | 0.036 | 0.010 | 0.556 |
| L_sfs            | 0.089 | 4.310 | 0.038 | 0.009 | 0.544 |
| R_stglat         | 0.183 | 4.208 | 0.041 | 0.009 | 0.535 |
| L_ifs            | 0.072 | 4.059 | 0.045 | 0.009 | 0.520 |
| L_ifg_triang     | 0.114 | 3.943 | 0.048 | 0.009 | 0.509 |
| L_rectus         | 0.129 | 3.823 | 0.051 | 0.008 | 0.497 |
| R_ifg_orb        | 0.211 | 3.785 | 0.052 | 0.008 | 0.493 |
| R_latfissAntvert | 0.317 | 3.746 | 0.054 | 0.008 | 0.489 |
| L_occtemp_Ling   | 0.058 | 3.720 | 0.054 | 0.008 | 0.486 |

*without Yonsei group*

| Region          | Mean Square | F      | Sig.  | Partial Eta Squared | Power |
|-----------------|-------------|--------|-------|---------------------|-------|
| R_insShort      | 1.359       | 15.244 | 0.000 | 0.038               | 0.973 |
| R_precuneus     | 0.344       | 12.156 | 0.001 | 0.030               | 0.935 |
| L_octemps_ML    | 0.305       | 11.836 | 0.001 | 0.029               | 0.929 |
| L_ifg_orb       | 0.501       | 11.266 | 0.001 | 0.028               | 0.917 |
| R_occAnt_sul    | 0.336       | 9.765  | 0.002 | 0.024               | 0.876 |
| L_occAnt_sulc   | 0.326       | 8.862  | 0.003 | 0.022               | 0.844 |
| L_stg_lat       | 0.383       | 8.787  | 0.003 | 0.022               | 0.841 |
| L_sup_par       | 0.224       | 8.336  | 0.004 | 0.021               | 0.821 |
| L_sfg           | 0.182       | 7.824  | 0.005 | 0.020               | 0.797 |
| R_octemp_ML     | 0.141       | 7.796  | 0.005 | 0.020               | 0.795 |
| R_occtemp_ML.s  | 0.214       | 7.733  | 0.006 | 0.019               | 0.792 |
| R_planumtempS   | 0.309       | 7.668  | 0.006 | 0.019               | 0.789 |
| R_occsupG       | 0.215       | 7.617  | 0.006 | 0.019               | 0.786 |
| L_ips           | 0.126       | 7.396  | 0.007 | 0.019               | 0.774 |
| R_sfg           | 0.159       | 7.362  | 0.007 | 0.018               | 0.772 |
| R_ips           | 0.131       | 6.944  | 0.009 | 0.017               | 0.748 |
| R_ifgTr         | 0.212       | 6.868  | 0.009 | 0.017               | 0.744 |
| L_precuneus     | 0.196       | 6.822  | 0.009 | 0.017               | 0.741 |
| L_inf_angular   | 0.170       | 6.570  | 0.011 | 0.017               | 0.725 |
| R_cuneus        | 0.136       | 6.460  | 0.011 | 0.016               | 0.718 |
| L_ifg_op        | 0.159       | 6.417  | 0.012 | 0.016               | 0.715 |
| R_rectus        | 0.280       | 6.408  | 0.012 | 0.016               | 0.714 |
| L_temp_pole     | 0.347       | 6.206  | 0.013 | 0.016               | 0.700 |
| R_orbG          | 0.167       | 6.035  | 0.014 | 0.015               | 0.688 |
| L_plan_tempor_s | 0.243       | 6.025  | 0.015 | 0.015               | 0.687 |
| R_parietalS     | 0.154       | 5.933  | 0.015 | 0.015               | 0.681 |
| R_frontopolTrs  | 0.169       | 5.799  | 0.017 | 0.015               | 0.671 |
| L_parietoOc     | 0.116       | 5.790  | 0.017 | 0.015               | 0.670 |
| L_rectus        | 0.202       | 5.775  | 0.017 | 0.015               | 0.669 |
| L_ITG           | 0.205       | 5.753  | 0.017 | 0.015               | 0.667 |

|                |       |       |       |       |       |
|----------------|-------|-------|-------|-------|-------|
| R_precentS     | 0.169 | 5.706 | 0.017 | 0.014 | 0.664 |
| L_cuneus       | 0.106 | 5.652 | 0.018 | 0.014 | 0.660 |
| R_temporalPOle | 0.334 | 5.553 | 0.019 | 0.014 | 0.652 |
| L_ins_g_short  | 0.414 | 5.534 | 0.019 | 0.014 | 0.651 |
| R_subpar       | 0.178 | 5.525 | 0.019 | 0.014 | 0.650 |
| R_precentrInf  | 0.134 | 5.428 | 0.020 | 0.014 | 0.642 |
| R_supTempsul   | 0.095 | 5.361 | 0.021 | 0.014 | 0.637 |
| R_stglat       | 0.233 | 5.248 | 0.022 | 0.013 | 0.628 |
| R_mfg          | 0.099 | 5.203 | 0.023 | 0.013 | 0.624 |
| L_mfg          | 0.100 | 5.086 | 0.025 | 0.013 | 0.614 |
| R_infang       | 0.124 | 5.027 | 0.026 | 0.013 | 0.609 |
| R_subcall      | 0.723 | 4.995 | 0.026 | 0.013 | 0.606 |
| R_supFr        | 0.092 | 4.975 | 0.026 | 0.013 | 0.604 |
| R_latfusif     | 0.199 | 4.867 | 0.028 | 0.012 | 0.595 |
| L_cingMarg_s   | 0.111 | 4.604 | 0.033 | 0.012 | 0.572 |
| L_fis_post     | 0.111 | 4.602 | 0.033 | 0.012 | 0.571 |
| L_inf_smg      | 0.119 | 4.535 | 0.034 | 0.011 | 0.565 |
| L_stg          | 0.240 | 4.438 | 0.036 | 0.011 | 0.556 |
| R_ifg_orb      | 0.240 | 4.326 | 0.038 | 0.011 | 0.546 |
| R_latFissureP  | 0.092 | 4.205 | 0.041 | 0.011 | 0.534 |
| L_sfs          | 0.077 | 3.894 | 0.049 | 0.010 | 0.503 |
| L_trsv         | 0.088 | 3.883 | 0.049 | 0.010 | 0.502 |

*without Newcastle group*

| Region         | Mean Square | F      | Sig.  | Partial Eta Squared | Power |
|----------------|-------------|--------|-------|---------------------|-------|
| R_precuneus    | 0.418       | 14.954 | 0.000 | 0.031               | 0.971 |
| L_sup_par      | 0.410       | 14.920 | 0.000 | 0.031               | 0.971 |
| R_ips          | 0.246       | 12.921 | 0.000 | 0.027               | 0.948 |
| R_planumtempS  | 0.511       | 12.817 | 0.000 | 0.027               | 0.947 |
| R_parietalS    | 0.334       | 12.620 | 0.000 | 0.026               | 0.944 |
| L_ips          | 0.200       | 11.599 | 0.001 | 0.024               | 0.925 |
| L_octemps_ML   | 0.290       | 11.309 | 0.001 | 0.024               | 0.919 |
| L_occAnt_sulc  | 0.419       | 11.291 | 0.001 | 0.024               | 0.918 |
| R_ifgTr        | 0.300       | 9.768  | 0.002 | 0.020               | 0.877 |
| L_precuneus    | 0.269       | 9.441  | 0.002 | 0.020               | 0.866 |
| L_cuneus       | 0.171       | 9.172  | 0.003 | 0.019               | 0.856 |
| R_occAnt_sul   | 0.300       | 8.967  | 0.003 | 0.019               | 0.848 |
| R_mfg          | 0.171       | 8.959  | 0.003 | 0.019               | 0.848 |
| L_ifg_op       | 0.219       | 8.867  | 0.003 | 0.019               | 0.844 |
| R_supTempsul   | 0.154       | 8.715  | 0.003 | 0.018               | 0.838 |
| R_frontopolTrs | 0.267       | 8.678  | 0.003 | 0.018               | 0.836 |
| L_cingMarg_s   | 0.216       | 8.625  | 0.003 | 0.018               | 0.834 |
| L_sfg          | 0.197       | 8.501  | 0.004 | 0.018               | 0.829 |
| L_inf_angular  | 0.221       | 8.413  | 0.004 | 0.018               | 0.825 |

|                 |       |       |       |       |       |
|-----------------|-------|-------|-------|-------|-------|
| L_ifg_orb       | 0.363 | 8.077 | 0.005 | 0.017 | 0.810 |
| R_insSHort      | 0.711 | 7.999 | 0.005 | 0.017 | 0.806 |
| R_precentrInf   | 0.195 | 7.910 | 0.005 | 0.017 | 0.801 |
| L_ITG           | 0.274 | 7.847 | 0.005 | 0.017 | 0.798 |
| R_occtemp_ML.s  | 0.206 | 7.525 | 0.006 | 0.016 | 0.782 |
| R_occsupG       | 0.219 | 7.442 | 0.007 | 0.016 | 0.777 |
| L_temp_pole     | 0.396 | 7.142 | 0.008 | 0.015 | 0.760 |
| L_occ_s         | 0.232 | 7.128 | 0.008 | 0.015 | 0.759 |
| R_cuneus        | 0.140 | 6.820 | 0.009 | 0.014 | 0.741 |
| R_subcall       | 0.918 | 6.433 | 0.012 | 0.014 | 0.716 |
| L_parietoOc     | 0.127 | 6.382 | 0.012 | 0.013 | 0.713 |
| R_supFr         | 0.120 | 6.275 | 0.013 | 0.013 | 0.705 |
| R_octemp_ML     | 0.106 | 6.091 | 0.014 | 0.013 | 0.692 |
| R_ifg_op        | 0.179 | 5.926 | 0.015 | 0.013 | 0.681 |
| L_stg_lat       | 0.257 | 5.901 | 0.016 | 0.012 | 0.679 |
| R_infang        | 0.135 | 5.562 | 0.019 | 0.012 | 0.653 |
| R_sfg           | 0.118 | 5.521 | 0.019 | 0.012 | 0.650 |
| L_ifs           | 0.093 | 5.372 | 0.021 | 0.011 | 0.638 |
| L_ifg_triang    | 0.156 | 5.316 | 0.022 | 0.011 | 0.633 |
| R_latFissureP   | 0.111 | 5.110 | 0.024 | 0.011 | 0.616 |
| R_precentr      | 0.294 | 5.102 | 0.024 | 0.011 | 0.616 |
| L_plan_tempor_s | 0.203 | 5.053 | 0.025 | 0.011 | 0.612 |
| L_stg           | 0.257 | 4.892 | 0.027 | 0.010 | 0.598 |
| L_rectus        | 0.166 | 4.876 | 0.028 | 0.010 | 0.596 |
| R_precentS      | 0.141 | 4.663 | 0.031 | 0.010 | 0.577 |
| L_inf_smg       | 0.122 | 4.652 | 0.032 | 0.010 | 0.576 |
| L_mfg           | 0.088 | 4.477 | 0.035 | 0.009 | 0.560 |
| R_mtg           | 0.143 | 4.330 | 0.038 | 0.009 | 0.546 |
| R_subpar        | 0.137 | 4.313 | 0.038 | 0.009 | 0.545 |
| R_moccG         | 0.107 | 4.281 | 0.039 | 0.009 | 0.542 |
| R_orbG          | 0.114 | 4.225 | 0.040 | 0.009 | 0.536 |
| R_itg           | 0.138 | 4.183 | 0.041 | 0.009 | 0.532 |
| R_latfusif      | 0.166 | 4.014 | 0.046 | 0.009 | 0.516 |
| L_precentralg   | 0.217 | 3.964 | 0.047 | 0.008 | 0.511 |
| L_paracentral_g | 0.158 | 3.932 | 0.048 | 0.008 | 0.508 |
| L_sfs           | 0.076 | 3.717 | 0.054 | 0.008 | 0.486 |
| L_trsv          | 0.085 | 3.714 | 0.055 | 0.008 | 0.485 |

*without KCL group*

| Region       | Mean Square | F      | Sig.  | Partial Eta Squared | Power |
|--------------|-------------|--------|-------|---------------------|-------|
| R_precuneus  | 0.448       | 16.069 | 0.000 | 0.033               | 0.979 |
| L_octemps_ML | 0.377       | 14.677 | 0.000 | 0.030               | 0.969 |
| L_sup_par    | 0.364       | 13.440 | 0.000 | 0.028               | 0.955 |

|                 |       |        |       |       |       |
|-----------------|-------|--------|-------|-------|-------|
| R_planumtempS   | 0.514 | 12.895 | 0.000 | 0.027 | 0.948 |
| R_ips           | 0.234 | 12.359 | 0.000 | 0.026 | 0.939 |
| L_ips           | 0.198 | 11.450 | 0.001 | 0.024 | 0.922 |
| R_occAnt_sul    | 0.377 | 11.295 | 0.001 | 0.023 | 0.918 |
| R_parietalS     | 0.288 | 11.077 | 0.001 | 0.023 | 0.913 |
| R_frontopolTrs  | 0.333 | 10.939 | 0.001 | 0.023 | 0.910 |
| L_ifg_orb       | 0.465 | 10.292 | 0.001 | 0.021 | 0.893 |
| L_occAnt_sulc   | 0.376 | 10.150 | 0.002 | 0.021 | 0.889 |
| L_precuneus     | 0.290 | 10.133 | 0.002 | 0.021 | 0.888 |
| R_occtemp_ML.s  | 0.276 | 10.042 | 0.002 | 0.021 | 0.885 |
| L_ITG           | 0.332 | 9.648  | 0.002 | 0.020 | 0.873 |
| L_temp_pole     | 0.509 | 9.257  | 0.002 | 0.019 | 0.859 |
| R_supTempsul    | 0.163 | 9.155  | 0.003 | 0.019 | 0.855 |
| L_sfg           | 0.210 | 9.130  | 0.003 | 0.019 | 0.854 |
| R_mfg           | 0.168 | 8.801  | 0.003 | 0.018 | 0.842 |
| R_ifgTr         | 0.271 | 8.793  | 0.003 | 0.018 | 0.841 |
| R_precentrInf   | 0.223 | 8.769  | 0.003 | 0.018 | 0.840 |
| L_ifg_op        | 0.217 | 8.753  | 0.003 | 0.018 | 0.840 |
| L_inf_angular   | 0.227 | 8.749  | 0.003 | 0.018 | 0.839 |
| L_cingMarg_s    | 0.208 | 8.368  | 0.004 | 0.017 | 0.823 |
| L_parietoOc     | 0.168 | 8.293  | 0.004 | 0.017 | 0.820 |
| R_subcall       | 1.109 | 7.847  | 0.005 | 0.016 | 0.798 |
| R_cuneus        | 0.161 | 7.816  | 0.005 | 0.016 | 0.797 |
| R_subpar        | 0.250 | 7.801  | 0.005 | 0.016 | 0.796 |
| L_cuneus        | 0.142 | 7.665  | 0.006 | 0.016 | 0.789 |
| R_insSHort      | 0.665 | 7.522  | 0.006 | 0.016 | 0.781 |
| R_occsupG       | 0.213 | 7.395  | 0.007 | 0.015 | 0.775 |
| L_rectus        | 0.230 | 6.782  | 0.009 | 0.014 | 0.739 |
| R_supFr         | 0.126 | 6.543  | 0.011 | 0.014 | 0.723 |
| R_sfg           | 0.139 | 6.517  | 0.011 | 0.014 | 0.722 |
| R_mtg           | 0.200 | 6.044  | 0.014 | 0.013 | 0.689 |
| R_latFissureP   | 0.131 | 5.965  | 0.015 | 0.012 | 0.683 |
| R_ifg_orb       | 0.317 | 5.669  | 0.018 | 0.012 | 0.661 |
| R_octemp_ML     | 0.099 | 5.611  | 0.018 | 0.012 | 0.657 |
| L_precentralg   | 0.302 | 5.555  | 0.019 | 0.012 | 0.653 |
| L_paracentral_g | 0.218 | 5.443  | 0.020 | 0.011 | 0.644 |
| R_precentr      | 0.314 | 5.437  | 0.020 | 0.011 | 0.643 |
| R_infang        | 0.128 | 5.392  | 0.021 | 0.011 | 0.640 |
| R_itg           | 0.176 | 5.327  | 0.021 | 0.011 | 0.634 |
| L_inf_smg       | 0.137 | 5.313  | 0.022 | 0.011 | 0.633 |
| R_ifg_op        | 0.161 | 5.300  | 0.022 | 0.011 | 0.632 |
| L_ifg_triang    | 0.153 | 5.201  | 0.023 | 0.011 | 0.624 |
| L_ifs           | 0.092 | 5.201  | 0.023 | 0.011 | 0.624 |
| L_occ_s         | 0.161 | 5.008  | 0.026 | 0.010 | 0.608 |
| R_temporalPOle  | 0.295 | 4.936  | 0.027 | 0.010 | 0.602 |

|                 |       |       |       |       |       |
|-----------------|-------|-------|-------|-------|-------|
| R_latfusif      | 0.206 | 4.839 | 0.028 | 0.010 | 0.593 |
| L_stg           | 0.250 | 4.773 | 0.029 | 0.010 | 0.587 |
| R_precentS      | 0.144 | 4.734 | 0.030 | 0.010 | 0.584 |
| L_occ_m         | 0.115 | 4.711 | 0.030 | 0.010 | 0.582 |
| L_mfg           | 0.092 | 4.649 | 0.032 | 0.010 | 0.576 |
| L_plan_tempor_s | 0.180 | 4.454 | 0.035 | 0.009 | 0.558 |
| R_moccG         | 0.109 | 4.410 | 0.036 | 0.009 | 0.554 |
| L_fiss_hor_ant  | 0.246 | 4.386 | 0.037 | 0.009 | 0.552 |
| R_rectus        | 0.184 | 4.255 | 0.040 | 0.009 | 0.539 |
| L_stg_lat       | 0.184 | 4.248 | 0.040 | 0.009 | 0.539 |
| L_fis_ver_ant   | 0.238 | 4.202 | 0.041 | 0.009 | 0.534 |
| R_paracentr     | 0.165 | 4.197 | 0.041 | 0.009 | 0.534 |
| R_supTrans      | 0.095 | 4.103 | 0.043 | 0.009 | 0.525 |
| L_octempSul_lat | 0.151 | 4.089 | 0.044 | 0.009 | 0.523 |
| R_orbG          | 0.109 | 3.964 | 0.047 | 0.008 | 0.511 |

*without Sydney group*

| Region          | Mean Square | F      | Sig.  | Partial Eta Squared | Observed Power |
|-----------------|-------------|--------|-------|---------------------|----------------|
| R_planumtempS   | 0.716       | 18.294 | 0.000 | 0.044               | 0.989          |
| R_occAnt_sul    | 0.465       | 14.125 | 0.000 | 0.034               | 0.963          |
| L_octemps_ML    | 0.362       | 14.105 | 0.000 | 0.034               | 0.963          |
| L_collaTr_ants  | 0.551       | 13.097 | 0.000 | 0.032               | 0.951          |
| R_supTempsul    | 0.221       | 12.349 | 0.000 | 0.030               | 0.939          |
| R_precuneus     | 0.329       | 12.048 | 0.001 | 0.029               | 0.934          |
| L_occAnt_sulc   | 0.417       | 11.163 | 0.001 | 0.027               | 0.915          |
| R_occtemp_ML.s  | 0.302       | 10.989 | 0.001 | 0.027               | 0.911          |
| R_ips           | 0.185       | 9.949  | 0.002 | 0.024               | 0.882          |
| L_octempSul_lat | 0.313       | 8.511  | 0.004 | 0.021               | 0.829          |
| L_sup_par       | 0.229       | 8.419  | 0.004 | 0.021               | 0.825          |
| R_parietalS     | 0.216       | 8.299  | 0.004 | 0.020               | 0.820          |
| L_ifg_orb       | 0.363       | 8.249  | 0.004 | 0.020               | 0.817          |
| R_insSHort      | 0.704       | 7.821  | 0.005 | 0.019               | 0.797          |
| R_temporalPOle  | 0.454       | 7.585  | 0.006 | 0.019               | 0.785          |
| L_temp_pole     | 0.426       | 7.572  | 0.006 | 0.019               | 0.784          |
| R_ifgTr         | 0.225       | 7.438  | 0.007 | 0.018               | 0.777          |
| R_cuneus        | 0.144       | 7.175  | 0.008 | 0.018               | 0.762          |
| L_rectus        | 0.234       | 7.145  | 0.008 | 0.018               | 0.760          |
| L_ITG           | 0.245       | 7.139  | 0.008 | 0.018               | 0.760          |
| L_ifg_op        | 0.168       | 6.879  | 0.009 | 0.017               | 0.744          |
| R_mtg           | 0.222       | 6.867  | 0.009 | 0.017               | 0.744          |
| R_frontopolTrs  | 0.203       | 6.830  | 0.009 | 0.017               | 0.741          |
| R_precentrInf   | 0.170       | 6.756  | 0.010 | 0.017               | 0.737          |
| R_ifg_op        | 0.197       | 6.614  | 0.010 | 0.016               | 0.728          |
| R_latFissureP   | 0.142       | 6.474  | 0.011 | 0.016               | 0.718          |

|                 |       |       |       |       |       |
|-----------------|-------|-------|-------|-------|-------|
| L_precuneus     | 0.178 | 6.376 | 0.012 | 0.016 | 0.712 |
| R_itg           | 0.199 | 6.142 | 0.014 | 0.015 | 0.696 |
| R_occsupG       | 0.173 | 6.012 | 0.015 | 0.015 | 0.687 |
| R_transpost     | 0.237 | 5.955 | 0.015 | 0.015 | 0.682 |
| R_infang        | 0.139 | 5.858 | 0.016 | 0.014 | 0.675 |
| R_subcall       | 0.825 | 5.787 | 0.017 | 0.014 | 0.670 |
| L_sfg           | 0.132 | 5.748 | 0.017 | 0.014 | 0.667 |
| L_ips           | 0.097 | 5.676 | 0.018 | 0.014 | 0.662 |
| L_occ_m         | 0.134 | 5.477 | 0.020 | 0.014 | 0.646 |
| L_precentralg   | 0.294 | 5.373 | 0.021 | 0.013 | 0.638 |
| R_mfg           | 0.102 | 5.326 | 0.022 | 0.013 | 0.634 |
| L_fiss_hor_ant  | 0.301 | 5.311 | 0.022 | 0.013 | 0.633 |
| L_stg_lat       | 0.224 | 5.284 | 0.022 | 0.013 | 0.631 |
| R_cingMP        | 0.132 | 5.196 | 0.023 | 0.013 | 0.623 |
| L_parietoOc     | 0.103 | 5.151 | 0.024 | 0.013 | 0.620 |
| L_infTempSul    | 0.147 | 5.092 | 0.025 | 0.013 | 0.615 |
| R_stglat        | 0.214 | 5.030 | 0.025 | 0.012 | 0.609 |
| L_stg           | 0.255 | 4.988 | 0.026 | 0.012 | 0.606 |
| L_inf_angular   | 0.127 | 4.874 | 0.028 | 0.012 | 0.596 |
| L_cingMarg_s    | 0.118 | 4.840 | 0.028 | 0.012 | 0.593 |
| R_latfusif      | 0.198 | 4.836 | 0.028 | 0.012 | 0.592 |
| L_occ_s         | 0.150 | 4.705 | 0.031 | 0.012 | 0.581 |
| R_moccG         | 0.114 | 4.522 | 0.034 | 0.011 | 0.564 |
| L_plan_polsup   | 0.394 | 4.496 | 0.035 | 0.011 | 0.562 |
| R_octemp_ML     | 0.075 | 4.398 | 0.037 | 0.011 | 0.553 |
| L_fis_post      | 0.102 | 4.345 | 0.038 | 0.011 | 0.548 |
| R_rectus        | 0.183 | 4.310 | 0.039 | 0.011 | 0.544 |
| L_plan_tempor_s | 0.173 | 4.309 | 0.039 | 0.011 | 0.544 |
| L_central       | 0.071 | 4.178 | 0.042 | 0.010 | 0.532 |
| L_cuneus        | 0.075 | 4.115 | 0.043 | 0.010 | 0.525 |
| L_paracentral_g | 0.165 | 4.113 | 0.043 | 0.010 | 0.525 |
| L_ifg_triang    | 0.114 | 3.967 | 0.047 | 0.010 | 0.511 |
| R_precentr      | 0.230 | 3.965 | 0.047 | 0.010 | 0.511 |
| R_Jenses        | 0.171 | 3.947 | 0.048 | 0.010 | 0.509 |
| L_inf_smg       | 0.102 | 3.932 | 0.048 | 0.010 | 0.507 |
| R_octemp_Lat    | 0.146 | 3.912 | 0.049 | 0.010 | 0.505 |
| R_sfg           | 0.080 | 3.798 | 0.052 | 0.009 | 0.494 |

*without Oxford group*

| Region         | Mean Square | F      | Sig.  | Partial Eta Squared | Power |
|----------------|-------------|--------|-------|---------------------|-------|
| L_octemps_ML   | 0.345       | 13.220 | 0.000 | 0.034               | 0.952 |
| L_sup_par      | 0.350       | 13.144 | 0.000 | 0.034               | 0.951 |
| R_planumtempS  | 0.453       | 11.607 | 0.001 | 0.030               | 0.925 |
| R_occtemp_ML.s | 0.296       | 10.944 | 0.001 | 0.028               | 0.910 |



|                |       |        |       |       |       |
|----------------|-------|--------|-------|-------|-------|
| R_precuneus    | 0.301 | 10.848 | 0.001 | 0.028 | 0.907 |
| L_ips          | 0.184 | 10.561 | 0.001 | 0.027 | 0.900 |
| R_ips          | 0.192 | 10.179 | 0.002 | 0.026 | 0.889 |
| R_parietalS    | 0.240 | 9.157  | 0.003 | 0.024 | 0.855 |
| L_ifg_op       | 0.228 | 9.150  | 0.003 | 0.024 | 0.855 |
| L_precuneus    | 0.251 | 8.761  | 0.003 | 0.023 | 0.840 |
| R_subcall      | 1.200 | 8.638  | 0.003 | 0.022 | 0.834 |
| L_cingMarg_s   | 0.210 | 8.414  | 0.004 | 0.022 | 0.825 |
| R_mfg          | 0.165 | 8.401  | 0.004 | 0.022 | 0.824 |
| R_frontopolTrs | 0.256 | 8.393  | 0.004 | 0.022 | 0.824 |
| R_supTempsul   | 0.145 | 8.163  | 0.005 | 0.021 | 0.813 |
| R_occAnt_sul   | 0.254 | 7.510  | 0.006 | 0.019 | 0.780 |
| R_precentrInf  | 0.183 | 7.492  | 0.006 | 0.019 | 0.779 |
| L_inf_angular  | 0.195 | 7.470  | 0.007 | 0.019 | 0.778 |
| L_cuneus       | 0.139 | 7.400  | 0.007 | 0.019 | 0.774 |
| R_insSHort     | 0.655 | 7.313  | 0.007 | 0.019 | 0.770 |
| L_temp_pole    | 0.383 | 7.243  | 0.007 | 0.019 | 0.766 |
| L_ifg_orb      | 0.326 | 7.134  | 0.008 | 0.019 | 0.759 |
| L_occAnt_sulc  | 0.258 | 7.018  | 0.008 | 0.018 | 0.753 |
| L_sfg          | 0.162 | 7.010  | 0.008 | 0.018 | 0.752 |
| R_ifgTr        | 0.205 | 6.477  | 0.011 | 0.017 | 0.719 |
| R_octemp_ML    | 0.112 | 6.326  | 0.012 | 0.016 | 0.708 |
| R_ifg_op       | 0.192 | 6.270  | 0.013 | 0.016 | 0.705 |
| R_itg          | 0.209 | 6.250  | 0.013 | 0.016 | 0.703 |
| L_ITG          | 0.226 | 6.247  | 0.013 | 0.016 | 0.703 |
| R_ifg_orb      | 0.321 | 5.542  | 0.019 | 0.014 | 0.651 |
| L_stg_lat      | 0.247 | 5.518  | 0.019 | 0.014 | 0.649 |
| L_stg          | 0.290 | 5.480  | 0.020 | 0.014 | 0.646 |
| R_latfusif     | 0.229 | 5.455  | 0.020 | 0.014 | 0.644 |
| R_cuneus       | 0.101 | 5.153  | 0.024 | 0.013 | 0.620 |
| R_subpar       | 0.156 | 4.993  | 0.026 | 0.013 | 0.606 |
| R_latFissureP  | 0.108 | 4.929  | 0.027 | 0.013 | 0.600 |
| R_supFr        | 0.093 | 4.827  | 0.029 | 0.013 | 0.592 |
| L_fis_ver_ant  | 0.263 | 4.781  | 0.029 | 0.012 | 0.587 |
| R_orbG         | 0.128 | 4.756  | 0.030 | 0.012 | 0.585 |
| L_precentralg  | 0.260 | 4.715  | 0.031 | 0.012 | 0.582 |
| L_inf_smg      | 0.122 | 4.694  | 0.031 | 0.012 | 0.580 |
| R_precentr     | 0.270 | 4.676  | 0.031 | 0.012 | 0.578 |
| R_infang       | 0.110 | 4.622  | 0.032 | 0.012 | 0.573 |
| R_mtg          | 0.154 | 4.611  | 0.032 | 0.012 | 0.572 |
| L_ifs          | 0.081 | 4.592  | 0.033 | 0.012 | 0.570 |
| L_ifg_triang   | 0.132 | 4.570  | 0.033 | 0.012 | 0.568 |
| L_parietoOc    | 0.090 | 4.539  | 0.034 | 0.012 | 0.566 |
| R_precentS     | 0.130 | 4.328  | 0.038 | 0.011 | 0.546 |
| R_sfg          | 0.091 | 4.180  | 0.042 | 0.011 | 0.532 |

|                  |       |       |       |       |       |
|------------------|-------|-------|-------|-------|-------|
| L_mfg            | 0.081 | 4.114 | 0.043 | 0.011 | 0.525 |
| R_octemp_Lat     | 0.158 | 4.036 | 0.045 | 0.011 | 0.518 |
| R_occsupG        | 0.115 | 3.999 | 0.046 | 0.010 | 0.514 |
| L_occ_s          | 0.127 | 3.994 | 0.046 | 0.010 | 0.513 |
| L_paracentral_g  | 0.161 | 3.966 | 0.047 | 0.010 | 0.511 |
| L_fiss_hor_ant   | 0.224 | 3.943 | 0.048 | 0.010 | 0.508 |
| R_latfissAntvert | 0.324 | 3.872 | 0.050 | 0.010 | 0.501 |
| R_temporalPOle   | 0.219 | 3.812 | 0.052 | 0.010 | 0.495 |
| L_ins_g_short    | 0.284 | 3.800 | 0.052 | 0.010 | 0.494 |
| L_ins_g          | 0.288 | 3.770 | 0.053 | 0.010 | 0.491 |
| L_sfs            | 0.078 | 3.735 | 0.054 | 0.010 | 0.487 |

*without Hong Kong group*

| Region          | Mean Square | F      | Sig.  | Partial Eta Squared | Power |
|-----------------|-------------|--------|-------|---------------------|-------|
| R_precuneus     | 0.506       | 17.760 | 0.000 | 0.037               | 0.988 |
| L_sup_par       | 0.473       | 17.266 | 0.000 | 0.036               | 0.986 |
| R_ips           | 0.322       | 17.132 | 0.000 | 0.036               | 0.985 |
| L_ips           | 0.269       | 15.525 | 0.000 | 0.033               | 0.976 |
| R_parietalS     | 0.400       | 15.319 | 0.000 | 0.032               | 0.974 |
| R_planumtempS   | 0.581       | 14.960 | 0.000 | 0.031               | 0.971 |
| L_octemps_ML    | 0.386       | 14.835 | 0.000 | 0.031               | 0.970 |
| R_supTempsul    | 0.244       | 13.663 | 0.000 | 0.029               | 0.958 |
| L_cingMarg_s    | 0.336       | 13.499 | 0.000 | 0.028               | 0.956 |
| L_precuneus     | 0.357       | 12.417 | 0.000 | 0.026               | 0.940 |
| R_mfg           | 0.236       | 12.383 | 0.000 | 0.026               | 0.940 |
| L_occAnt_sulc   | 0.455       | 12.238 | 0.001 | 0.026               | 0.937 |
| L_inf_angular   | 0.314       | 12.026 | 0.001 | 0.025               | 0.933 |
| R_occAnt_sul    | 0.391       | 11.533 | 0.001 | 0.024               | 0.923 |
| L_ITG           | 0.381       | 10.878 | 0.001 | 0.023               | 0.908 |
| R_ifgTr         | 0.331       | 10.792 | 0.001 | 0.023               | 0.906 |
| R_precentrInf   | 0.266       | 10.739 | 0.001 | 0.023               | 0.905 |
| R_insSHort      | 0.950       | 10.582 | 0.001 | 0.022               | 0.901 |
| L_sfg           | 0.242       | 10.517 | 0.001 | 0.022               | 0.899 |
| R_cuneus        | 0.205       | 9.784  | 0.002 | 0.021               | 0.877 |
| R_frontopolTrs  | 0.292       | 9.548  | 0.002 | 0.020               | 0.869 |
| L_ifg_orb       | 0.424       | 9.487  | 0.002 | 0.020               | 0.867 |
| L_ifg_op        | 0.234       | 9.472  | 0.002 | 0.020               | 0.867 |
| L_temp_pole     | 0.522       | 9.434  | 0.002 | 0.020               | 0.865 |
| L_parietoOc     | 0.183       | 9.117  | 0.003 | 0.019               | 0.854 |
| R_occtemp_ML.s  | 0.244       | 8.838  | 0.003 | 0.019               | 0.843 |
| R_occsupG       | 0.252       | 8.752  | 0.003 | 0.019               | 0.839 |
| L_plan_tempor_s | 0.352       | 8.650  | 0.003 | 0.018               | 0.835 |
| R_supFr         | 0.160       | 8.461  | 0.004 | 0.018               | 0.827 |
| L_cuneus        | 0.160       | 8.429  | 0.004 | 0.018               | 0.826 |

|                   |       |       |       |       |       |
|-------------------|-------|-------|-------|-------|-------|
| R_subpar          | 0.267 | 8.339 | 0.004 | 0.018 | 0.822 |
| R_infang          | 0.197 | 8.228 | 0.004 | 0.018 | 0.817 |
| R_latFissureP     | 0.174 | 8.100 | 0.005 | 0.017 | 0.811 |
| R_mtg             | 0.272 | 8.090 | 0.005 | 0.017 | 0.810 |
| R_precentS        | 0.236 | 7.846 | 0.005 | 0.017 | 0.798 |
| R_sfg             | 0.164 | 7.737 | 0.006 | 0.017 | 0.793 |
| L_occ_s           | 0.242 | 7.600 | 0.006 | 0.016 | 0.786 |
| R_octemp_ML       | 0.131 | 7.404 | 0.007 | 0.016 | 0.775 |
| L_inf_smg         | 0.190 | 7.297 | 0.007 | 0.016 | 0.769 |
| R_precentr        | 0.410 | 7.128 | 0.008 | 0.015 | 0.759 |
| L_ifs             | 0.120 | 6.917 | 0.009 | 0.015 | 0.747 |
| L_mfg             | 0.133 | 6.742 | 0.010 | 0.014 | 0.736 |
| R_itg             | 0.223 | 6.741 | 0.010 | 0.014 | 0.736 |
| R_ifg_op          | 0.201 | 6.683 | 0.010 | 0.014 | 0.732 |
| R_subcall         | 0.919 | 6.629 | 0.010 | 0.014 | 0.729 |
| R_moccG           | 0.162 | 6.566 | 0.011 | 0.014 | 0.725 |
| L_fiss_hor_ant    | 0.369 | 6.554 | 0.011 | 0.014 | 0.724 |
| L_stg_lat         | 0.284 | 6.552 | 0.011 | 0.014 | 0.724 |
| R_temporalPOle    | 0.388 | 6.516 | 0.011 | 0.014 | 0.722 |
| L_paracentral_g   | 0.260 | 6.475 | 0.011 | 0.014 | 0.719 |
| L_trsv            | 0.141 | 6.212 | 0.013 | 0.013 | 0.701 |
| R_supTrans        | 0.145 | 6.209 | 0.013 | 0.013 | 0.701 |
| R_latfusif        | 0.260 | 6.132 | 0.014 | 0.013 | 0.695 |
| L_precentralg     | 0.320 | 5.814 | 0.016 | 0.012 | 0.672 |
| L_collaTr_ants    | 0.251 | 5.703 | 0.017 | 0.012 | 0.664 |
| R_ifg_orb         | 0.317 | 5.663 | 0.018 | 0.012 | 0.661 |
| L_ifg_triang      | 0.163 | 5.624 | 0.018 | 0.012 | 0.658 |
| R_paracentr       | 0.210 | 5.411 | 0.020 | 0.012 | 0.641 |
| L_central         | 0.092 | 5.375 | 0.021 | 0.012 | 0.638 |
| R_orbG            | 0.146 | 5.306 | 0.022 | 0.011 | 0.633 |
| R_inffrontsule    | 0.090 | 5.090 | 0.025 | 0.011 | 0.615 |
| R_octemp_Lat      | 0.198 | 5.033 | 0.025 | 0.011 | 0.610 |
| R_Jenses          | 0.213 | 5.020 | 0.026 | 0.011 | 0.609 |
| L_stg             | 0.263 | 4.986 | 0.026 | 0.011 | 0.606 |
| L_occ_m           | 0.123 | 4.960 | 0.026 | 0.011 | 0.604 |
| R_INFparsupramarg | 0.135 | 4.928 | 0.027 | 0.011 | 0.601 |
| L_rectus          | 0.165 | 4.824 | 0.029 | 0.010 | 0.592 |
| R_parietoOcc      | 0.087 | 4.802 | 0.029 | 0.010 | 0.590 |
| R_stglat          | 0.204 | 4.687 | 0.031 | 0.010 | 0.579 |
| L_sfs             | 0.095 | 4.617 | 0.032 | 0.010 | 0.573 |
| L_ins_g_short     | 0.327 | 4.441 | 0.036 | 0.010 | 0.557 |
| R_cingMP          | 0.109 | 4.245 | 0.040 | 0.009 | 0.538 |
| L_fis_post        | 0.099 | 4.190 | 0.041 | 0.009 | 0.533 |
| L_octempSul_lat   | 0.155 | 4.187 | 0.041 | 0.009 | 0.533 |
| R_rectus          | 0.179 | 4.150 | 0.042 | 0.009 | 0.529 |

|                  |       |       |       |       |       |
|------------------|-------|-------|-------|-------|-------|
| R_latfissAntvert | 0.325 | 3.890 | 0.049 | 0.008 | 0.503 |
| L_fusi           | 0.132 | 3.851 | 0.050 | 0.008 | 0.499 |

*without UCL group*

| Region         | Mean Square | F      | Sig.  | Partial Eta Squared | Power |
|----------------|-------------|--------|-------|---------------------|-------|
| L_octemps_ML   | 0.442       | 17.300 | 0.000 | 0.043               | 0.986 |
| R_precuneus    | 0.425       | 15.325 | 0.000 | 0.038               | 0.974 |
| R_ifgTr        | 0.465       | 15.014 | 0.000 | 0.038               | 0.972 |
| L_sup_par      | 0.384       | 14.193 | 0.000 | 0.036               | 0.964 |
| R_planumtempS  | 0.542       | 13.550 | 0.000 | 0.034               | 0.957 |
| R_supTempsul   | 0.239       | 13.236 | 0.000 | 0.033               | 0.952 |
| R_parietalS    | 0.313       | 12.155 | 0.001 | 0.031               | 0.935 |
| L_cingMarg_s   | 0.297       | 12.062 | 0.001 | 0.030               | 0.934 |
| R_frontopolTrs | 0.333       | 11.201 | 0.001 | 0.028               | 0.916 |
| R_subcall      | 1.483       | 11.169 | 0.001 | 0.028               | 0.915 |
| L_precuneus    | 0.314       | 11.080 | 0.001 | 0.028               | 0.913 |
| L_ips          | 0.191       | 11.052 | 0.001 | 0.028               | 0.912 |
| L_ifg_orb      | 0.487       | 10.985 | 0.001 | 0.028               | 0.911 |
| R_mfg          | 0.209       | 10.818 | 0.001 | 0.027               | 0.907 |
| L_sfg          | 0.237       | 10.310 | 0.001 | 0.026               | 0.893 |
| R_insSHort     | 0.892       | 10.226 | 0.001 | 0.026               | 0.891 |
| R_ips          | 0.192       | 10.095 | 0.002 | 0.026               | 0.887 |
| L_temp_pole    | 0.543       | 10.086 | 0.002 | 0.026               | 0.886 |
| R_occAnt_sul   | 0.335       | 10.041 | 0.002 | 0.025               | 0.885 |
| R_occtemp_ML.s | 0.266       | 9.747  | 0.002 | 0.025               | 0.876 |
| L_parietoOc    | 0.193       | 9.610  | 0.002 | 0.024               | 0.871 |
| L_ITG          | 0.318       | 9.603  | 0.002 | 0.024               | 0.871 |
| L_cuneus       | 0.168       | 9.302  | 0.002 | 0.024               | 0.860 |
| L_rectus       | 0.277       | 8.413  | 0.004 | 0.021               | 0.825 |
| L_inf_angular  | 0.215       | 8.283  | 0.004 | 0.021               | 0.819 |
| L_ifs          | 0.146       | 8.278  | 0.004 | 0.021               | 0.819 |
| L_occAnt_sulc  | 0.303       | 8.199  | 0.004 | 0.021               | 0.815 |
| R_precentrInf  | 0.206       | 8.178  | 0.004 | 0.021               | 0.814 |
| R_latFissureP  | 0.177       | 8.021  | 0.005 | 0.020               | 0.806 |
| R_cuneus       | 0.157       | 7.790  | 0.006 | 0.020               | 0.795 |
| R_supFr        | 0.147       | 7.760  | 0.006 | 0.020               | 0.794 |
| L_ifg_triang   | 0.226       | 7.751  | 0.006 | 0.020               | 0.793 |
| R_ifg_op       | 0.226       | 7.414  | 0.007 | 0.019               | 0.775 |
| R_inffrontsulc | 0.129       | 7.222  | 0.008 | 0.018               | 0.764 |
| L_inf_smg      | 0.188       | 7.156  | 0.008 | 0.018               | 0.761 |
| R_mtg          | 0.226       | 6.757  | 0.010 | 0.017               | 0.737 |
| R_moccG        | 0.164       | 6.620  | 0.010 | 0.017               | 0.728 |
| R_orbG         | 0.173       | 6.559  | 0.011 | 0.017               | 0.724 |
| R_ifg_orb      | 0.372       | 6.556  | 0.011 | 0.017               | 0.724 |

|                   |       |       |       |       |       |
|-------------------|-------|-------|-------|-------|-------|
| R_octemp_ML       | 0.104 | 6.194 | 0.013 | 0.016 | 0.699 |
| L_ifg_op          | 0.148 | 5.977 | 0.015 | 0.015 | 0.684 |
| L_occ_s           | 0.188 | 5.864 | 0.016 | 0.015 | 0.676 |
| R_itg             | 0.189 | 5.771 | 0.017 | 0.015 | 0.669 |
| R_subpar          | 0.186 | 5.736 | 0.017 | 0.015 | 0.666 |
| R_INFparsupramarg | 0.159 | 5.719 | 0.017 | 0.015 | 0.665 |
| L_insulaA         | 0.262 | 5.424 | 0.020 | 0.014 | 0.642 |
| L_sfs             | 0.113 | 5.415 | 0.020 | 0.014 | 0.641 |
| L_fis_ver_ant     | 0.304 | 5.406 | 0.021 | 0.014 | 0.640 |
| R_supTrans        | 0.127 | 5.388 | 0.021 | 0.014 | 0.639 |
| R_Jenses          | 0.233 | 5.365 | 0.021 | 0.014 | 0.637 |
| L_fis_post        | 0.123 | 5.272 | 0.022 | 0.014 | 0.629 |
| L_paracentral_g   | 0.208 | 5.175 | 0.023 | 0.013 | 0.621 |
| L_octempSul_lat   | 0.195 | 5.169 | 0.024 | 0.013 | 0.621 |
| L_stg             | 0.273 | 5.143 | 0.024 | 0.013 | 0.619 |
| L_occ_m           | 0.124 | 5.122 | 0.024 | 0.013 | 0.617 |
| R_infang          | 0.122 | 5.096 | 0.025 | 0.013 | 0.615 |
| L_precentrInf     | 0.135 | 5.047 | 0.025 | 0.013 | 0.611 |
| R_parietoOcc      | 0.090 | 5.024 | 0.026 | 0.013 | 0.609 |
| R_temporalPOle    | 0.301 | 5.003 | 0.026 | 0.013 | 0.607 |
| R_octemp_Lat      | 0.187 | 4.852 | 0.028 | 0.012 | 0.594 |
| L_plan_tempor_s   | 0.189 | 4.642 | 0.032 | 0.012 | 0.575 |
| R_occsupG         | 0.130 | 4.450 | 0.036 | 0.011 | 0.557 |
| R_sfg             | 0.094 | 4.424 | 0.036 | 0.011 | 0.555 |
| L_infTempSul      | 0.123 | 4.303 | 0.039 | 0.011 | 0.544 |
| L_mfg             | 0.086 | 4.288 | 0.039 | 0.011 | 0.542 |
| R_transpost       | 0.173 | 4.202 | 0.041 | 0.011 | 0.534 |
| R_precentr        | 0.241 | 4.165 | 0.042 | 0.011 | 0.530 |
| R_latfissAntvert  | 0.334 | 3.967 | 0.047 | 0.010 | 0.511 |
| L_fiss_hor_ant    | 0.222 | 3.958 | 0.047 | 0.010 | 0.510 |
| R_rectus          | 0.161 | 3.815 | 0.052 | 0.010 | 0.495 |
| L_ins_g           | 0.277 | 3.743 | 0.054 | 0.010 | 0.488 |

**Surface area ANCOVAs (age, gender and TIV as covariates)**

Results are fully consistent with those from the main sample.

**without Lille group**

| Region      | mean square | df    | F     | partial eta2 | p     | obs. power |
|-------------|-------------|-------|-------|--------------|-------|------------|
| R_octemp ML | 524443,587  | 1,461 | 7,220 | 0,016        | 0,007 | 0,765      |

**without Yonsei group**

| Region      | mean square | df    | F     | partial eta2 | p     | obs. power |
|-------------|-------------|-------|-------|--------------|-------|------------|
| R_octemp ML | 784851,915  | 1,395 | 9,898 | 0,025        | 0,002 | 0,881      |

**without Newcastle group**

| <i>Region</i> | <i>mean square</i> | <i>df</i> | <i>F</i> | <i>partial eta2</i> | <i>p</i> | <i>obs. power</i> |
|---------------|--------------------|-----------|----------|---------------------|----------|-------------------|
| R_occtemp ML  | 629800,775         | 1,472     | 8,665    | 0,018               | 0,003    | 0,836             |

***without KCL group***

| <i>Region</i> | <i>mean square</i> | <i>df</i> | <i>F</i> | <i>partial eta2</i> | <i>p</i> | <i>obs. power</i> |
|---------------|--------------------|-----------|----------|---------------------|----------|-------------------|
| R_occtemp ML  | 831137,731         | 1,476     | 11,346   | 0,023               | 0,001    | 0,919             |

***without Sydney group***

| <i>Region</i> | <i>mean square</i> | <i>df</i> | <i>F</i> | <i>partial eta2</i> | <i>p</i> | <i>obs. power</i> |
|---------------|--------------------|-----------|----------|---------------------|----------|-------------------|
| R_occtemp ML  | 771329,198         | 1,404     | 10,685   | 0,026               | 0,001    | 0,903             |

***without Oxford group***

| <i>Region</i> | <i>mean square</i> | <i>df</i> | <i>F</i> | <i>partial eta2</i> | <i>p</i> | <i>obs. power</i> |
|---------------|--------------------|-----------|----------|---------------------|----------|-------------------|
| R_occtemp ML  | 830055,090         | 1,382     | 11,872   | 0,03                | 0,001    | 0,930             |

***without Hong Kong group***

| <i>Region</i> | <i>mean square</i> | <i>df</i> | <i>F</i> | <i>partial eta2</i> | <i>p</i> | <i>obs. power</i> |
|---------------|--------------------|-----------|----------|---------------------|----------|-------------------|
| R_occtemp ML  | 590105,105         | 1,465     | 8,089    | 0,017               | 0,005    | 0,810             |

***without UCL group***

| <i>Region</i> | <i>mean square</i> | <i>df</i> | <i>F</i> | <i>partial eta2</i> | <i>p</i> | <i>obs. power</i> |
|---------------|--------------------|-----------|----------|---------------------|----------|-------------------|
| R_occtemp ML  | 613551,331         | 1,389     | 8,418    | 0,021               | 0,004    | 0,825             |

***Volume MANCOVAs (age, gender and TIV as covariates)***

*The leave-one-out analysis showed that the volume differences were dependent on the inclusion of the Sydney group. While the small MMSE difference was significant in this group, this was one of the two groups with the largest VH group, so it is difficult to understand if the differences in volume results in the leave-one-out analysis were due to the variation in statistical power. However, given that in the N=146 subsample (NPI) the Sydney group is not included and we found the same difference in the amygdala plus the hippocampus when adding the relevant available covariates, the contribution of these regions to PH-VH is supported by our data overall.*

***without Lille group***

| <i>Region</i>                | <i>mean square</i> | <i>df</i> | <i>F</i> | <i>partial eta2</i> | <i>p</i> | <i>obs. power</i> |
|------------------------------|--------------------|-----------|----------|---------------------|----------|-------------------|
| Left-Cerebellum-White-Matter | 21148259,518       | 1,457     | 3,993    | 0,009               | 0,046    | 0,514             |
| Left-Amygdala                | 198677,703         | 1,457     | 3,760    | 0,008               | 0,053    | 0,490             |
| Right-Amygdala               | 223700,951         | 1,457     | 4,327    | 0,009               | 0,038    | 0,546             |

***without Yonsei group***

| <i>Region</i>                | <i>mean square</i> | <i>df</i> | <i>F</i> | <i>partial eta2</i> | <i>p</i> | <i>obs. power</i> |
|------------------------------|--------------------|-----------|----------|---------------------|----------|-------------------|
| Left-Cerebellum-White-Matter | 29759925,583       | 1,395     | 5,213    | 0,013               | 0,023    | 0,625             |
| Left-Amygdala                | 213275,446         | 1,395     | 3,783    | 0,010               | 0,053    | 0,492             |
| Right-Amygdala               | 286612,852         | 1,395     | 5,033    | 0,013               | 0,025    | 0,609             |

**without Newcastle group**

| <i>Region</i>                | <i>mean square</i> | <i>df</i> | <i>F</i> | <i>partial eta2</i> | <i>p</i> | <i>obs. power</i> |
|------------------------------|--------------------|-----------|----------|---------------------|----------|-------------------|
| Left-Cerebellum-White-Matter | 18300727,667       | 1,472     | 3,573    | 0,008               | 0,059    | 0,471             |
| Left-Amygdala                | 289031,643         | 1,472     | 5,503    | 0,012               | 0,019    | 0,648             |
| Right-Amygdala               | 211263,858         | 1,472     | 4,050    | 0,009               | 0,045    | 0,519             |

**without KCL group**

| <i>Region</i>                | <i>mean square</i> | <i>df</i> | <i>F</i> | <i>partial eta2</i> | <i>p</i> | <i>obs. power</i> |
|------------------------------|--------------------|-----------|----------|---------------------|----------|-------------------|
| Left-Cerebellum-White-Matter | 20441807,659       | 1,476     | 3,843    | 0,008               | 0,051    | 0,499             |
| Left-Amygdala                | 375712,039         | 1,476     | 7,272    | 0,015               | 0,007    | 0,768             |
| Right-Amygdala               | 297646,868         | 1,476     | 5,853    | 0,012               | 0,016    | 0,675             |

**without Sydney group**

| <i>Region</i>                | <i>mean square</i> | <i>df</i> | <i>F</i> | <i>partial eta2</i> | <i>p</i> | <i>obs. power</i> |
|------------------------------|--------------------|-----------|----------|---------------------|----------|-------------------|
| Left-Cerebellum-White-Matter | 11151129,788       | 1,404     | 2,189    | 0,005               | 0,140    | 0,314             |
| Left-Amygdala                | 154059,211         | 1,404     | 2,900    | 0,007               | 0,089    | 0,397             |
| Right-Amygdala               | 50705,368          | 1,404     | 0,944    | 0,002               | 0,332    | 0,163             |

**without Oxford group**

| <i>Region</i>                | <i>mean square</i> | <i>df</i> | <i>F</i> | <i>partial eta2</i> | <i>p</i> | <i>obs. power</i> |
|------------------------------|--------------------|-----------|----------|---------------------|----------|-------------------|
| Left-Cerebellum-White-Matter | 17566193,828       | 1,382     | 3,559    | 0,009               | 0,060    | 0,469             |
| Left-Amygdala                | 462292,677         | 1,382     | 9,160    | 0,024               | 0,003    | 0,855             |
| Right-Amygdala               | 356095,410         | 1,382     | 7,174    | 0,019               | 0,008    | 0,762             |

**without Hong Kong group**

| <i>Region</i>                | <i>mean square</i> | <i>df</i> | <i>F</i> | <i>partial eta2</i> | <i>p</i> | <i>obs. power</i> |
|------------------------------|--------------------|-----------|----------|---------------------|----------|-------------------|
| Left-Cerebellum-White-Matter | 27485445,952       | 1,465     | 5,255    | 0,011               | 0,022    | 0,628             |
| Left-Amygdala                | 431005,217         | 1,465     | 8,209    | 0,017               | 0,004    | 0,816             |
| Right-Amygdala               | 330712,956         | 1,465     | 6,447    | 0,014               | 0,011    | 0,717             |

**without UCL group**

| <i>Region</i>   | <i>mean square</i> | <i>df</i> | <i>F</i> | <i>partial eta2</i> | <i>p</i> | <i>obs. power</i> |
|-----------------|--------------------|-----------|----------|---------------------|----------|-------------------|
| Left-Cerebel-WM | 33881207,505       | 1,389     | 6,654    | 0,017               | 0,010    | 0,730             |
| Left-Amygdala   | 376353,666         | 1,389     | 7,686    | 0,020               | 0,006    | 0,790             |
| Right-Amygdala  | 268675,762         | 1,389     | 5,386    | 0,014               | 0,021    | 0,639             |

**Supplementary Note 4.** *NPI subgroup custom MANCOVAs with binary score (PD-VH vs. PD-noVH) and correlation analysis (VH only) with LED as covariate.*

The NPI subgroup (146 patients, 79 PD-noVH, 67 PD-VH) is the group for which we had the richest clinical dataset, as for most of these patients we have not only age and gender, but also disease onset, levo-dopa equivalent daily dose (LED) and mini mental state examination (MMSE) data, PD severity, together with the continuous NPI score. 126 had UPDRS-III scores. 20 from the same group did not have those scores. We computed the mean for the group regardless of VH and used that score in our model.

Patients do not differ gender (35 females PD-noVH, 27 females PD-VH) ( $\chi^2 = .238, p = 0.62$ ), age (PD-VH=70.39  $\pm$  6.82, PD-noVH = 69.64  $\pm$  6.45) [ $F(87,47) = 0.47, MSE = 20.39, p = .5$ ], disease onset (PD-VH=5.86  $\pm$  5.40, PD-noVH = 4.64  $\pm$  5.22) [ $F(87,47) = 1.91, MSE = 53.85, p = .17$ ], levodopa equivalent daily dose (LED) (PD-VH=575.86  $\pm$  366.43 mg, PD-noVH =502.17 $\pm$  327.34 mg) [ $F(87,47) = 1.60, MSE = 191615.74, p = .21$ ], and MMSE score (PD-VH=26.28 $\pm$ 2.69, PD-noVH =26.81 $\pm$ 2.51), [ $F(87,47)=1.49, MSE = 10.05, p = .22$ ].

Patients were matched for UPDRS-III within each study. However, when carrying out a one-way ANOVA using the mean to fill the 20 missing values (N PD-VH =7 , N PD-noVH = 13) they were not matched for UPDRS-III, with PD-VH having a higher score [ $F(1,113)=6.9, MSE = 1187.07, p = .01$ ].

We ran a custom multivariate ANOVA model with MMSE, gender, age, TIV, UPDRS-III, LED and onset as covariates, controlling also for the interaction of those covariates that correlated with each other (age \* LED + age \* MMSE + onset \* LED + onset \* UPDRS3 +LED \* MMSE).

**Supplementary Table 4(a). Demographics**

| <i>Group</i>            | <i>Age</i>       | <i>MMSE</i>      | <i>LED</i>             | <i>Onset</i>    | <i>UPDRS-III</i>  |
|-------------------------|------------------|------------------|------------------------|-----------------|-------------------|
| PD-VH<br>(N=67, 27 F)   | 70.39 (SD=6.82)  | 26.28 (SD =2.69) | 575.86 mg (SD =366.43) | 5.86 (SD =5.40) | 30.32 (SD =15.25) |
|                         | <i>p = .49</i>   | <i>p = .22</i>   | <i>p = .21</i>         | <i>p = .17</i>  | <i>p = .01</i>    |
| PD-noVH<br>(N=79, 35 F) | 69.64 (SD =6.45) | 26.81(SD =2.51)  | 503.17 mg (SD =327.34) | 4.64 (SD =5.22) | 24.61 (SD =10.93) |

**Supplementary Table 4(b).** *The table below report results of the between-subjects effects tests on the different regions when comparing PD-VH and PD-noVH as described in Supplementary note 4. Pairwise comparisons are Bonferroni corrected. First, we present a summary of the demographics and clinical information of this subsample; for UPDRS-III values, we report the scores including the N=20 subjects with missing values; for original UPDRS-III scores for each group see **Table 1** in the main text (study: Yonsei University; University of Newcastle; University of Lille)*

**Cortical thickness**

| <b>Region</b> | <b>df</b> | <b>MSE</b> | <b>F</b> | <b>p</b> | <b>partial eta2</b> | <b>power</b> |
|---------------|-----------|------------|----------|----------|---------------------|--------------|
| R_planumtemp  | 1.133     | 0.57       | 16.22    | 0.00     | 0.11                | 0.98         |



|                   |       |      |       |      |      |      |
|-------------------|-------|------|-------|------|------|------|
| L_cing.marg       | 1.133 | 0.28 | 13.28 | 0.00 | 0.09 | 0.95 |
| R_sts             | 1.133 | 0.22 | 13.02 | 0.00 | 0.09 | 0.95 |
| L_occtemp.ml.sul  | 1.133 | 0.23 | 10.31 | 0.00 | 0.07 | 0.89 |
| R_smg             | 1.133 | 0.26 | 9.80  | 0.00 | 0.07 | 0.87 |
| R_jensen(ips)     | 1.133 | 0.39 | 9.71  | 0.00 | 0.07 | 0.87 |
| L_coll.trsv       | 1.133 | 0.39 | 9.50  | 0.00 | 0.07 | 0.86 |
| R_ips             | 1.133 | 0.16 | 9.39  | 0.00 | 0.07 | 0.86 |
| L_sup.parg        | 1.133 | 0.24 | 8.58  | 0.00 | 0.06 | 0.83 |
| R_occtemp.ml.sul  | 1.133 | 0.20 | 8.43  | 0.00 | 0.06 | 0.82 |
| L_temp.pole       | 1.133 | 0.41 | 8.41  | 0.00 | 0.06 | 0.82 |
| L_occtem.lat.sul  | 1.133 | 0.27 | 7.13  | 0.01 | 0.05 | 0.76 |
| R_parietalS       | 1.133 | 0.18 | 7.11  | 0.01 | 0.05 | 0.75 |
| L_ifs             | 1.133 | 0.12 | 7.08  | 0.01 | 0.05 | 0.75 |
| R_mtg             | 1.133 | 0.22 | 7.03  | 0.01 | 0.05 | 0.75 |
| R_precent.inf.sul | 1.133 | 0.17 | 6.80  | 0.01 | 0.05 | 0.74 |
| L_ips             | 1.133 | 0.12 | 6.78  | 0.01 | 0.05 | 0.73 |
| R_occ.m.g         | 1.133 | 0.16 | 6.49  | 0.01 | 0.05 | 0.72 |
| R_occ.ant.sulc    | 1.133 | 0.20 | 6.47  | 0.01 | 0.05 | 0.71 |
| R_precuneus       | 1.133 | 0.16 | 6.33  | 0.01 | 0.05 | 0.70 |
| R_latfis          | 1.133 | 0.14 | 6.28  | 0.01 | 0.05 | 0.70 |
| R_transv.post     | 1.133 | 0.24 | 6.07  | 0.02 | 0.04 | 0.69 |
| R_cuneus          | 1.133 | 0.12 | 5.91  | 0.02 | 0.04 | 0.68 |
| L_fiss.hor        | 1.133 | 0.29 | 5.71  | 0.02 | 0.04 | 0.66 |
| R_ifg_orb         | 1.133 | 0.36 | 5.64  | 0.02 | 0.04 | 0.65 |
| R_ifg_op          | 1.133 | 0.17 | 5.61  | 0.02 | 0.04 | 0.65 |
| R_itg             | 1.133 | 0.17 | 5.58  | 0.02 | 0.04 | 0.65 |
| L_paracentral g   | 1.133 | 0.23 | 5.58  | 0.02 | 0.04 | 0.65 |
| R_ifg_tri         | 1.133 | 0.18 | 5.54  | 0.02 | 0.04 | 0.65 |
| L_precuneus       | 1.133 | 0.15 | 5.54  | 0.02 | 0.04 | 0.65 |
| L_itg             | 1.133 | 0.18 | 5.44  | 0.02 | 0.04 | 0.64 |
| R_ifs             | 1.133 | 0.10 | 5.43  | 0.02 | 0.04 | 0.64 |
| L_occ.ant.sul     | 1.133 | 0.19 | 5.33  | 0.02 | 0.04 | 0.63 |
| R_parietocc.sul   | 1.133 | 0.08 | 5.23  | 0.02 | 0.04 | 0.62 |
| R_angular         | 1.133 | 0.11 | 5.23  | 0.02 | 0.04 | 0.62 |
| L_planum.pol      | 1.133 | 0.44 | 5.21  | 0.02 | 0.04 | 0.62 |
| R_occtemp.lat.s   | 1.133 | 0.20 | 5.06  | 0.03 | 0.04 | 0.61 |
| L_its             | 1.133 | 0.13 | 5.01  | 0.03 | 0.04 | 0.60 |
| R_mfg             | 1.133 | 0.09 | 4.58  | 0.03 | 0.03 | 0.57 |
| L_precentral.g    | 1.133 | 0.24 | 4.47  | 0.04 | 0.03 | 0.56 |
| R_frontopolar.gs  | 1.133 | 0.12 | 4.37  | 0.04 | 0.03 | 0.55 |
| L_occ.m g         | 1.133 | 0.10 | 4.29  | 0.04 | 0.03 | 0.54 |
| R_subpar.s        | 1.133 | 0.11 | 4.23  | 0.04 | 0.03 | 0.53 |
| L_ifg_tri         | 1.133 | 0.11 | 4.09  | 0.05 | 0.03 | 0.52 |
| L_parietocc       | 1.133 | 0.09 | 3.92  | 0.05 | 0.03 | 0.50 |
| L_ifg_op          | 1.133 | 0.16 | 3.83  | 0.05 | 0.03 | 0.49 |

### ***Subcortical volumes***

| <i>Region</i> | <i>df</i> | <i>ms</i>   | <i>F</i> | <i>p</i> | <i>partial eta2</i> | <i>obs. Power</i> |
|---------------|-----------|-------------|----------|----------|---------------------|-------------------|
| L.Hippocampus | 1,146     | 702601.17   | 6.528    | 0.012    | 0.047               | 0.718             |
| L.Amygdala    | 1,146     | 221211.382  | 7.011    | 0.009    | 0.050               | 0.748             |
| R.Caudate     | 1,146     | 844168.4132 | 4.691    | 0.032    | 0.034               | 0.574             |
| R.Hippocampus | 1,146     | 582591.8887 | 3.745    | 0.05     | 0.027               | 0.483             |

***Cortical thickness.*** Multivariate analysis results for cortical thickness differences in PD+VH vs. PD noVH patients.

***Subcortical volumes.*** Multivariate analysis results for subcortical volume differences in PD+VH vs. PD noVH patients. Regions are sorted by *p* value. \* values greater for PD with VH;

For thickness, no significant main effect of age, MMSE, LED, UPDRS, onset, age \* LED + age \* MMSE + onset \* LED + onset \* UPDRS-III + LED \* MMSE was observed. We found a significant main effect of gender [F(87,47)=1.93, p=.008] and TIV [F(87,47)=2.28, p=.001].

For subcortical volumes, we observed a main effect of gender [F(17,117)=2.97, p<.001] and TIV [F(17,117)=28.73, p<.001]. No significant main effect of age, MMSE, LED, UPDRS, onset, age \* LED + age \* MMSE + onset \* LED + onset \* UPDRS-III + LED \* MMSE was observed.

Finally, we carried out the same correlational analysis described in the main text, but with LEDD as a covariate, as it might be related to severity of VH, obtaining the same results: negative correlations were found for the right superior temporal sulcus ( $r = -.26, p = .03$ ), the right inferior parietal sulcus ( $r = -.24, p = .05$ ), the right Jensen sulcus ( $r = -.28, p = .02$ ) and the right cingulum marginalis ( $r = -.24, p = .056$ ), which was a trend in this case. In addition there was the positive correlation reported also in the main text with the right frontomarginal gyrus ( $r = .26, p = .04$ ).

**Supplementary Note 5.** *Subgroup analysis with ordinal VH score.*

An additional sensitivity analysis was carried out for a large subgroup, that is all those patients for which we had additional information about the degree of hallucinations, levodopa equivalent dose (LED) and onset date. Overall, the 128 PD-VH patients (64 mild, 47 moderate, 17 severe) were matched for age [ $F(2,125)=1.59$ ,  $p=0.21$ ], onset [ $F(2,125)=0.18$ ,  $p=0.84$ ], gender ( $\chi^2=.87$ ,  $p=.65$ ) and TIV [ $F(2,125)=0.07$ ,  $p=0.93$ ] (we did not have enough LED or cognition data to check for these variables).

Patients with mild VH had a mean age of  $66.71 \pm 8.20$ , those with moderate VH  $69.10 \pm 7.37$  and those with severe VH  $69.34 \pm 7.30$ . Those with mild VH had a disease duration of  $5.29 \pm 4.06$  years, those with moderate VH  $5.57 \pm 5.58$  and those with severe  $4.79 \pm 4.05$ . Finally, patients with mild VH had a mean TIV of  $1477284.73 \pm 178401.32$ , patients with moderate VH  $1490485.07 \pm 188476.12$ , patients with severe VH  $1480473.38 \pm 195998.02$ .

As there is not a specific criterion to do so, in order to create an ordinal variable, for patients we had UPDRS scoring we have retained that (0 = no hallucinations or delusions, 1= illusions or non formed hallucinations, 2 = Formed hallucinations independent of environmental stimuli, 3= Formed hallucinations with loss of insight, 4= patient has delusions or paranoia (but no patients had a UPDRS 4 score or a NPI, NEVHI, MIAMI equivalent). We have “translated” the NPI continuous score to such a scale, with scores ranging from 1 to 3 categorised as “minor/mild VH”, scores ranging from 4 to 8 as “moderate” and scores above 9 as “severe”; for the MIAMI we have used a similar procedure, as the scale ranges from 0 to 14. Finally, for the NEVHI, we have used the raw data from the interviews to determine whether the person had mild, moderate or severe visual hallucinations.

To isolate regions where there was some difference between the groups in order to create a multi-region ordinal regression model, we ran a multivariate ANCOVA for each morphometric measure (subcortical volumes, SA, cortical thickness) was ran with *degree of hallucinations as between subjects factor* on hallucinators only (McCrum-Gardner, 2008) and with age, onset, gender, TIV as covariates.

For thickness we used age [ $F(2,121)=1.25$ ,  $p=0.62$ ], gender [ $F(2,121)=1.95$ ,  $p=0.52$ ], onset [ $F(2,121)=.3.91$ ,  $p=0.37$ ], and TIV [ $F(2,121)=.455$ ,  $p=.86$ ], as covariates, finding no main effect for any of these factors except for TIV. Participants differed in thickness in the left temporal pole, left insula, left collateralis transversalis posterior, left suborbital gyrus, right frontomarginal gyrus (as in the NPI correlational analysis) and in the right lateral horizontal fissure, with severe and moderate hallucinators having higher thickness in these regions. We speculate that greater thickness in these regions may constitute a pre-existing risk factor for aggravation of VH severity but additional data would be needed to further explore this hypothesis.

For SA the covariates age [ $F(2,121)=.42$ ,  $p=0.87$ ], gender [ $F(2,121)=5.25$ ,  $p=0.34$ ], onset [ $F(2,121)=.88$ ,  $p=0.68$ ], TIV [ $F(2,121)=4.64$ ,  $p=0.36$ ] showed no main effect. Participants differed in SA in the occipitotemporal gyri and in the precuneus bilaterally, calcarine fissure, insula and precentral gyrus; SA was reduced in severe hallucinators if compared to mild and moderate hallucinators.

For subcortical volumes we found a main effect of age [ $F(2,121)=2.91$ ,  $p<.001$ ], gender [ $F(2,121)=2.02$ ,  $p=0.003$ ], and TIV [ $F(2,121)=769.44$ ,  $p<.001$ ], but not of onset [ $F(2,121)=1.37$ ,  $p=0.11$ ]. Participants differed in volume

in the bilateral inferior lateral ventricles, with moderate hallucinators having greater ventricle volume than mild hallucinators.

We entered the regions emerged as significant in ordinal logistic regression models carried out with R package MASS. For *thickness*, the intercepts for mild vs. moderate hallucinators ( $t=1.87$ ,  $st.error = 3.41$ ,  $intercept = 6.37$ ,  $p=.06$ ) showed a trend towards significant and was significant for moderate vs. severe ( $t=2.42$ ,  $st.error = 3.45$ ,  $intercept = 8.36$ ,  $p =.01$ ), were significant with  $residual\ deviance = 241.43$ ,  $AIC = 257.43$ . Interestingly, thickness in these regions is greater in the moderate and severe hallucinators overall, recalling how the right frontomarginal thickness positively correlated with the NPI score in the smaller sample. However, none of the regions significantly predicted the hallucinations ordinal score (all  $t$  values  $< \pm 1.5$  and all  $ps > .05$ ).

For *surface area* mild vs. moderate hallucinators ( $t = -1529.65$ ,  $st.error = 0.001$ ,  $intercept = -1.71$ ,  $p < .0001$ ) was significant, but not for moderate vs. severe ( $t = 1.44$ ,  $st.error = 0.28$ ,  $intercept = 0.41$ ,  $p = .15$ ), were significant with  $residual\ deviance = 231.47$ ,  $AIC = 253.47$ , with the coefficients for the left occipitotemporal fusiform gyrus being above the  $\sim 2$  threshold for the  $t$  value ( $t = -2.33$ ,  $p = .001$ ) and being greater in mild vs. moderate, and the left insula circularis showing the opposite pattern ( $t = 2.87$ ,  $p = .004$ ). The lack of significance when considering the comparison with those with a 'severe' score may be due to different reasons, with one being that the different PDP scales used in the different studies have slightly different criteria, but also that patients with higher scores may have delusions as well, which may as well be in the same continuum as visual hallucinations, but this does not necessarily imply a graver atrophy in the same regions underlying VH. Finally, the three groups have very different sample sizes, and this might as well affect the analyses, as one can notice the large variability within each group.

**Supplementary Note 6.** *Additional models and details about receptor density maps.*

**a) Additional models for thickness.**

For regions where there was a relationship between receptor density and structural morphometrics for all regions, additional analyses were conducted to assess whether this was simply the same effect as the relationship of the regions that differed or a feature of the whole brain by examining the non-significant regions.

*Cortical Thickness.* The models with 5-HT<sub>2A</sub> binding potential per region as predictor and the mean difference per region (considering only the regions where no difference between groups was observed) as dependent variable resulted not significant for regions that did not differ ( $\beta = .04$ ,  $t = .32$ ,  $p = 0.75$ ); a similar result was obtained for 5-HT<sub>1A</sub> ( $\beta = .03$ ,  $t = .28$ ,  $p = 0.78$ ). However the result was significant for D2/D3 ( $\beta = -.23$ ,  $t = -2.06$ ,  $p = .04$ ) for the same regions, possibly suggesting that D2/D3 alterations' relationship with thickness decrease go beyond the associating with VH in PD.

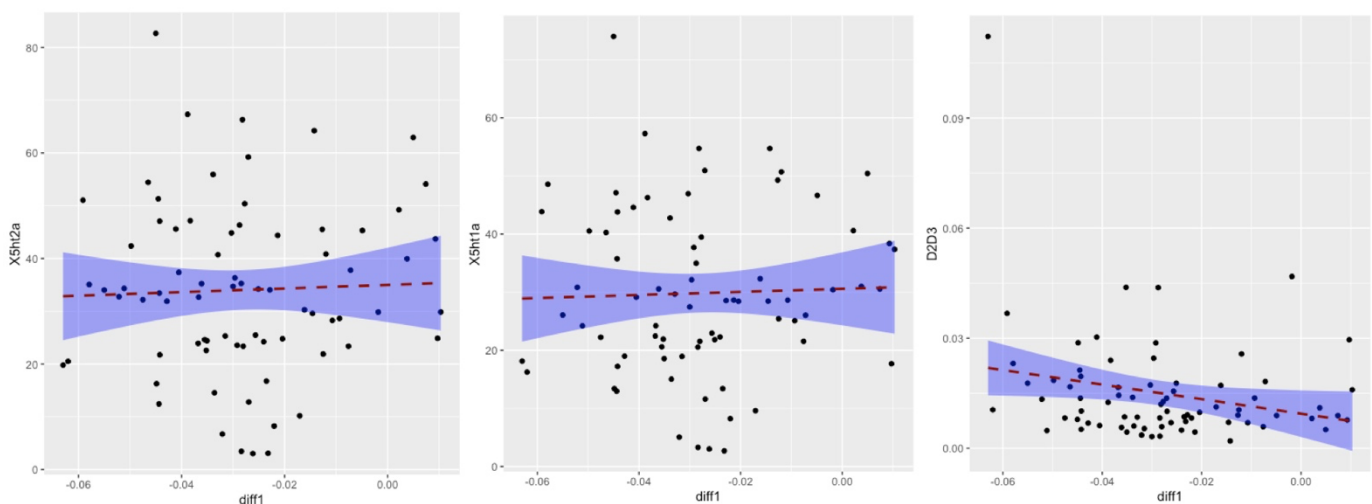

**Supplementary Figure 3.** Scatter plots for receptors density profiles and regions not differing in the two groups. Non significant results were found for serotonergic receptors, whereas the dopaminergic receptor resulted a significant predictor also in this model (as in the others presented in the main text). The shaded area represents the confidence interval.

**b) Receptors binding potentials models for volumes models results.**

Regression models were carried out to estimate the relationship between subcortical volumes (N=19) mean differences between hallucinators and non-hallucinators and receptor density profiles. As significantly differing regions were just the hippocampi and the amygdala, we ran separate models for each receptor using all regions' subcortical volumes. The models resulted not significant when 5-HT<sub>2A</sub> binding potential per region was used as predictor ( $\beta = -.14$ ,  $t = -0.6$ ,  $p = .5$ ), when 5-HT<sub>1A</sub> ( $\beta = -.24$ ,  $t = -1.01$ ,  $p = .32$ ) and D2/D3 ( $\beta = .06$ ,  $t = .24$ ,  $p = .82$ ) were used as predictors.

c) In order to better understand these results, we ran Pearson's correlations between each receptor's density maps at the cortical level, finding that 5-HT2A and D2/D3 did not show a significant correlation ( $r = .15$ ,  $p = .07$ ), whereas 5-HT2A and 5-HT1A did ( $r = .92$ ,  $p < .001$ ) and also 5-HT1A and D2/D3 ( $r = .27$ ,  $p = .002$ ).

**Supplementary Note 7. Principal Component Analysis for cortical thickness: additional information about the scree plot and the contribution of the different regions to Dimension1 and Dimension 2.**

**Cortical thickness PCA**

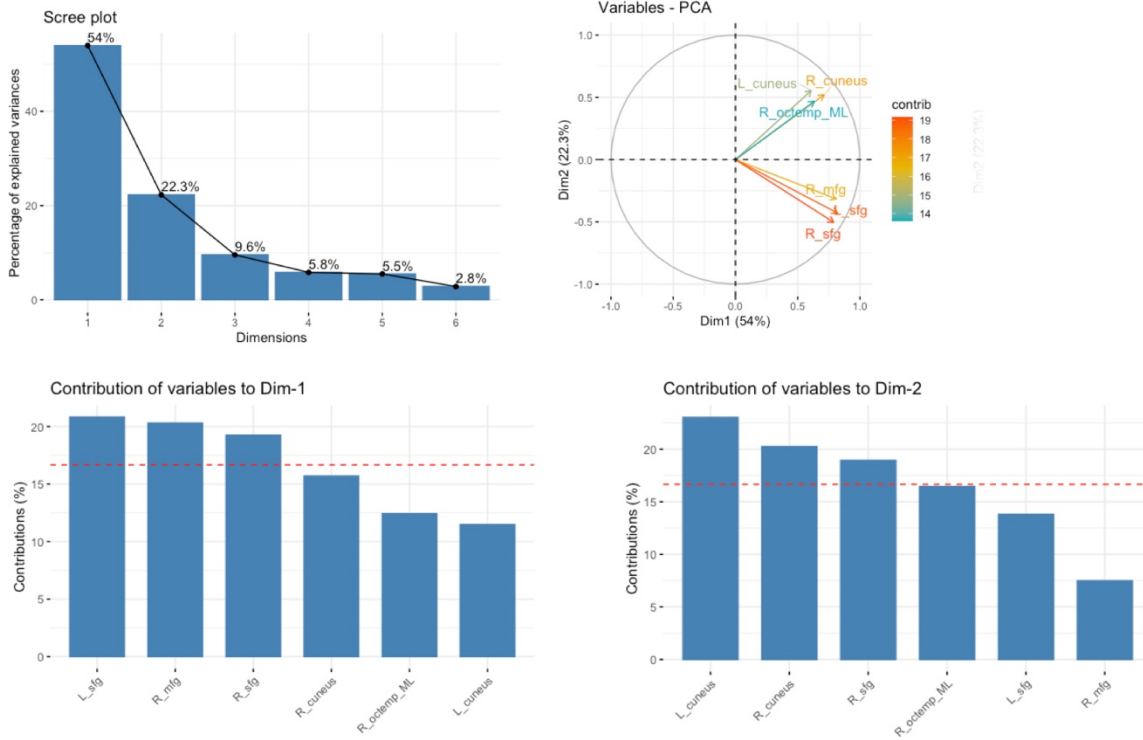

**Supplementary Figure 4. Top left:** Scree Plot for Cortical thickness data. On the y axis, the % of variance explained by each component, on the x axis the components number. Following the criterion of picking only components with eigenvalues  $>1$ , PC 1 and 2 were selected. **Top right:** visual representation of the components and the dimensions. The colours represent the contributing weights and cosine squared. **Bottom row:** Contributing weight by region for each selected dimension.

**Supplementary Note 8. Structural covariance.**

a) Differences in inter-regional correlations between PD-VH and PD-noVH represented with a correlogram. Covariance matrices computed on the GLM residuals used for the structural covariance analysis were used to compute the difference in the inter-regional correlation coefficients in [PD-VH – PDnoVH] patients (**Supplementary Figure 5**; those depicted are the difference in the coefficients). A cell by cell comparison of the correlation coefficients with the *cocor* package for R was computed to investigate regions that showed the highest covariance in PD-VH and in PD-noVH. In purple, inter-regional correlation coefficients that were greater for PD-VH, in yellow those greater for PD-noVH. The analysis on the z scores (Fischer) highlighted that the most significant regions with the most inter-regional correlation with other regions for VH patients were the left caudal MFG, left cuneus, left IPL, left ITG, left iCC, left LOG, left middle orbitofrontal gyrus, left paracentral gyrus, left IFG opercularis, left temporoparietal, right parahippocampal gyrus, right iFG opercularis, right IFG triangular, right temporoparietal. In particular the left cMFG highly correlated with parieto-occipital regions (IPL, cuneus, Lateral occipital gyrus, SPL, STG) and frontal (SFG), on both hemispheres; the left LOG with left SFG, MFG, STG, SMAR, and right IFG (all subdivision); the right PHG with temporal (left TP and STG), parietal (left precuneus, precentral) and occipitotemporal (right entorhinal, fusiform, inferior temporal) regions, mainly.

For PD-noVH patients, we found an overall greater significant of inter-regional correlation coefficients in the left and right pericallosal area, in the right lingual gyrus, and in the right superior frontal gyrus.



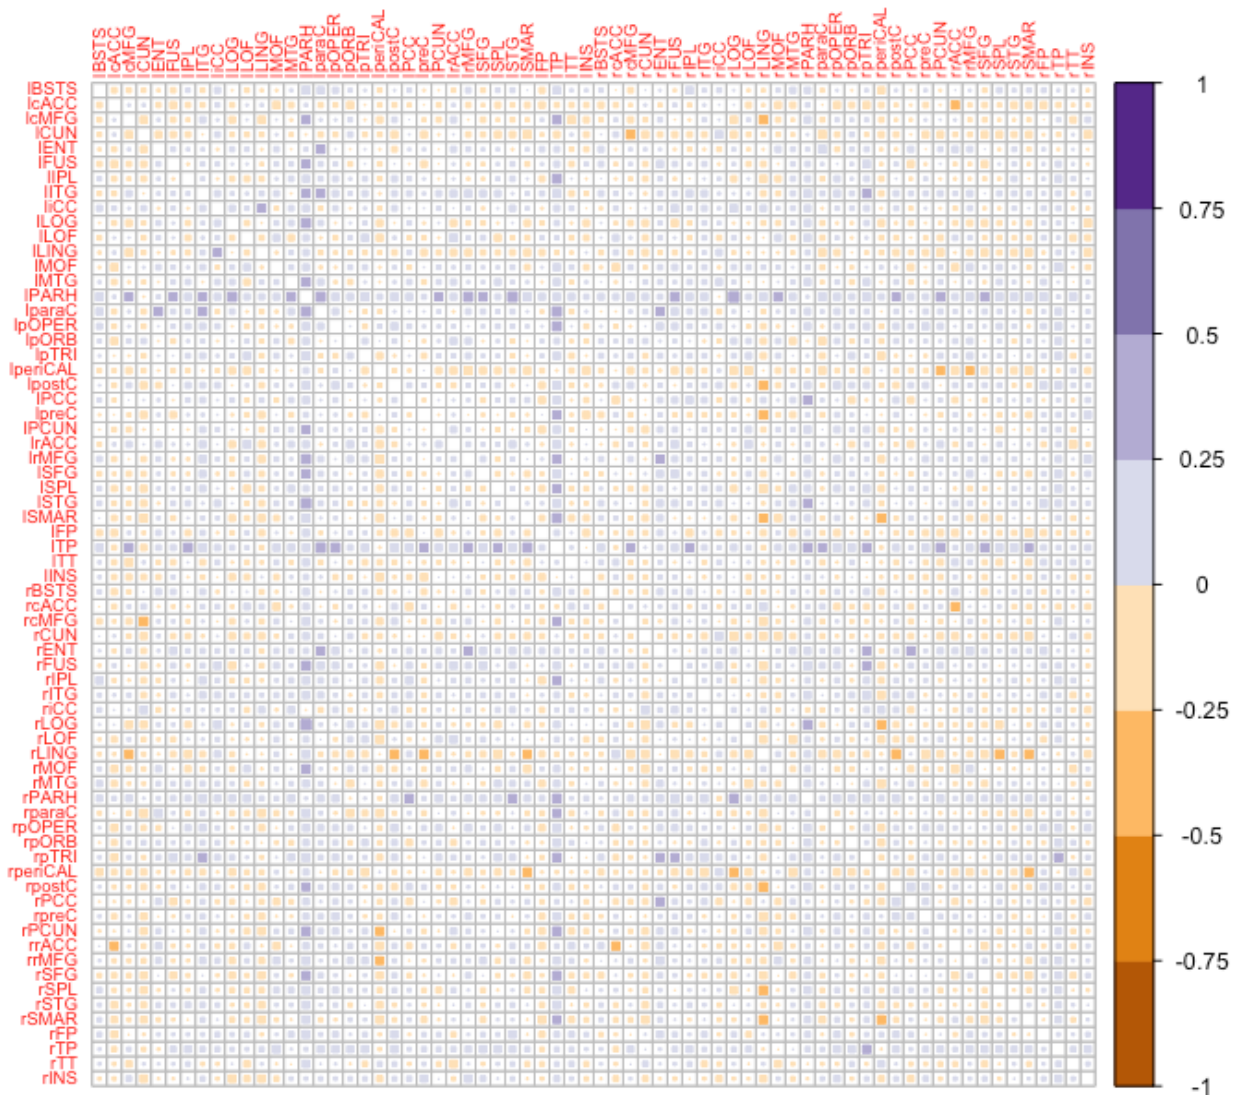

**Supplementary Figure 5.** Correlogram showing the difference in inter-regional correlation coefficients in PD-VH vs. PD-noVH patients for cortical thickness. The yellow squares indicate inter-regional coefficients that were greater for PD-noVH; of those, only some were significant, mainly those in the left and right pericallosal column, in the right lingual column.

The same procedure was carried out for *surface area*. However, we did not find any region where the correlation coefficient was greater for PD-noVH than for PD-VH. As for cortical thickness, regions with significant regions with the most inter-regional correlation with other regions were the left caudal MFG, left cuneus, left fusiform, right temporal transverse, right IFG triangularis, bilateral IFG opercularis and insula, IPL, SFG.

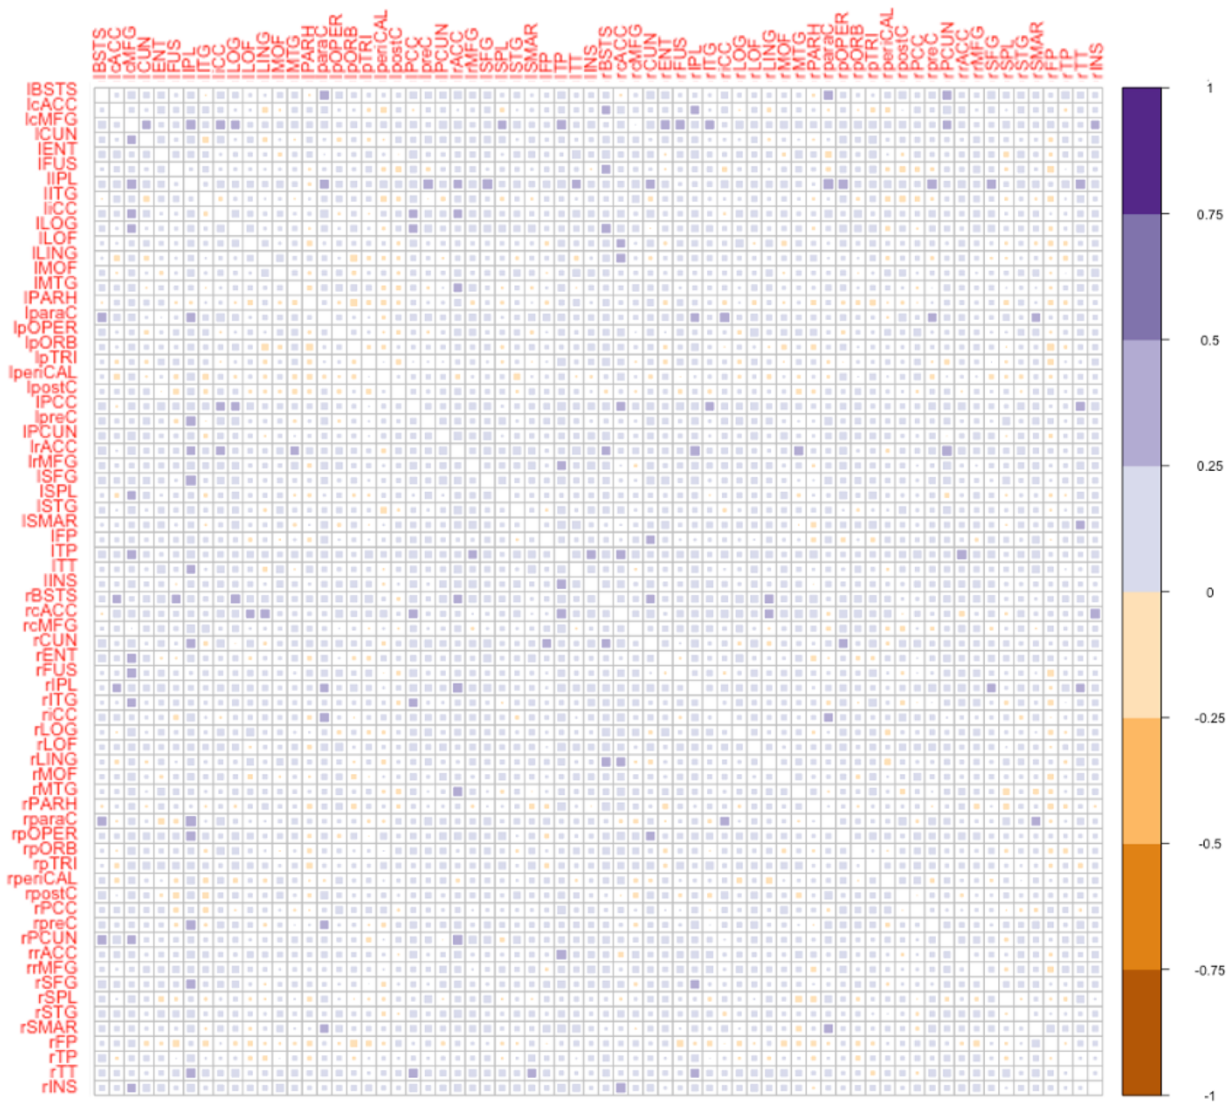

**Supplementary Figure 6.** Correlogram showing the difference in inter-regional correlation coefficients in PD-VH vs PD-noVH patients for cortical surface area. The orange squares indicate inter-regional coefficients that were greater for PD-noVH.

# Cortical Thickness

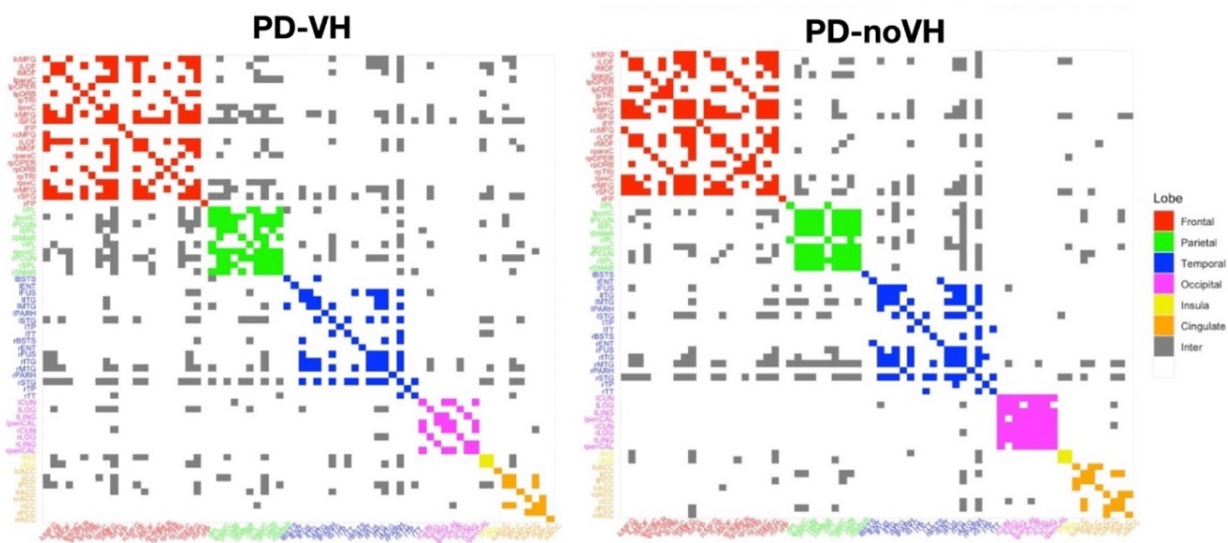

# Surface area

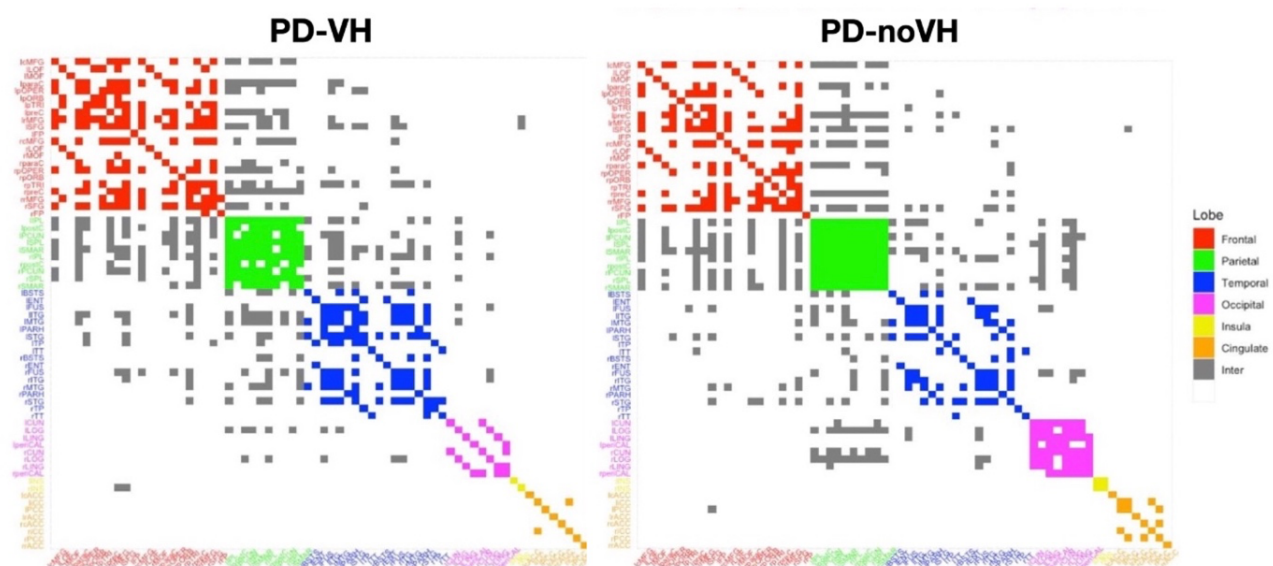

**Supplementary Figure 7.** Community plot by lobe for cortical thickness (top row), surface area (bottom row). Legend: Red = frontal: bilateral caudal middle frontal gyrus, lateral orbital frontal gyrus, middle orbital frontal gyrus, paracentral gyrus, inferior frontal gyrus orbital, opercularis, triangular, precentral gyrus, middle frontal gyrus, superior frontal gyrus, frontopolar. Green = parietal: bilateral inferior parietal lobe, postcentral gyrus, precuneus, superior parietal lobe, supra marginal gyrus. Blue = temporal: banks superior temporal, entorhinal, fusiform gyrus, inferior temporal gyrus, middle temporal gyrus, parahippocampal gyrus, superior temporal gyrus, temporoparietal, temporal transverse. Pink = occipital: cuneus, lateral occipital gyrus, lingual gyrus, pericallosal. Yellow = Insula. Orange = cingulate: anter

**b)** In order to further support our suggestion of particular networks involved, mentioned in the Discussion, we have also used, from the covariance analysis sample, the regions considered to be part of the DAN, VAN and DMN. We have compared the means of thickness and area in such regions in noVH vs VH (with age and gender as covariates). For this purpose we have collated together the mean of the regions making up each network and compared patients on those. These are the regions we used, based on Shine et al., 2014, 2015 (see References).

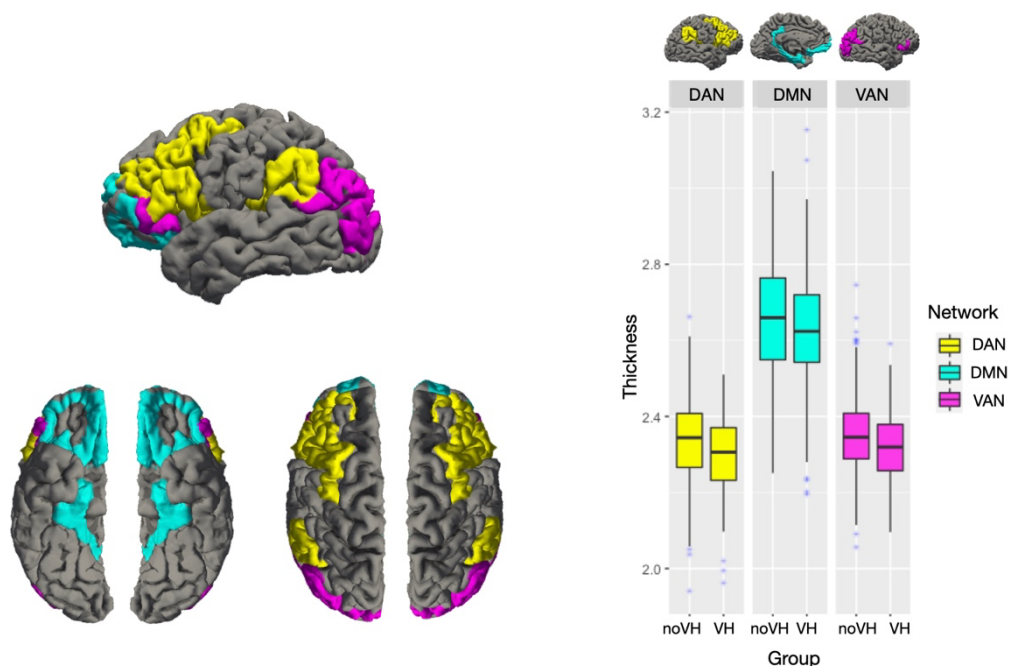

**Supplementary Figure 7.** Brain render showing the regions selected for the networks and bar plots showing the results, where we find significant differences in the VAN and the DAN, but not for the DMN.

#### DAN

Dorsolateral PFC – IFG opercularis and triangularis

Posterior parietal cortex - supramarginal gyrus

Frontal eye fields – precentral gyrus

Corpus striatum – this was not available from the current analyses

#### VAN

Basolateral amygdala - amygdala – this was not included in this analysis as the measurement is different for subcortical volumes than for thickness and area. However differences in the amygdala were reported here for both the main and the NPI sample.

Lateral and inferior PFC – IFG orbitalis, lateral orbitofrontal cortex (lOFC)

Temporoparietal junction - used the inferior parietal lobule (IPL)

Ventral striatum – as for the amygdala, we did not include the accumbens in this analysis, but we had it in the main analysis and no difference was observed in this region.

#### DMN

MT – PHG and enthorinal

Medial PFC - medial orbitofrontal cortex (mOFC) and frontopolar region

Posterior cingulate cortex

For thickness we find significant differences in the VAN [ $F(3,462) = 9.45, p = .002$ , partial eta squared = 0.02, CI 0.01;0.05] and the DAN [ $F(3,462) = 12.46, p < .001$ , partial eta squared = 0.03, 0.02;0.06] being reduced in thickness in PD-VH, but not in the DMN [ $F(3,462) = 1.87, p = .17$ , partial eta squared = 0.004, CI -0.01;0.05], whereas we do not

find any difference for surface area. This result is consistent with our suggestion that the group differences particularly involve the dorsal and ventral attention networks. In addition, both results are consistent with the differences found in the single regions making up such network in the main sample analysis.

Nevertheless, this analysis mainly summarises structural differences possibly related to neural pathology in these networks, whereas the findings of the structural covariance analysis investigate network-level properties related to cortical thinning and anomalies in surface area taking into account not only morphometric differences but connectivity metrics.
